1 **RESEARCH ARTICLE**

2 **Mutations in TIC100 impair and repair chloroplast protein import and**  
3 **impact retrograde signalling**

4 **Naresh Loudya<sup>1,2</sup>, Douglas P. F. Maffei<sup>1,†</sup>, Jocelyn Bédard<sup>2</sup>, Sabri Mohd. Ali<sup>2</sup>,**  
5 **Paul Devlin<sup>1</sup>, R. Paul Jarvis<sup>2</sup> and Enrique López-Juez<sup>1</sup>**

6 <sup>a</sup>Department of Biological Sciences, Royal Holloway University of London,  
7 Egham, Surrey TW20 0EX, UK

8 <sup>b</sup>Department of Plant Sciences, University of Oxford, South Parks Road, Oxford,  
9 OX1 3RB, UK

10 <sup>†</sup>Present address: Seagen, 21717 30th Drive S.E., Bothell, WA 98021, USA

11 Corresponding authors: Enrique López-Juez. E-mail: [e.lopez@rhul.ac.uk](mailto:e.lopez@rhul.ac.uk) and R.  
12 Paul Jarvis. E-mail: [paul.jarvis@plants.ox.ac.uk](mailto:paul.jarvis@plants.ox.ac.uk)

13 **Short title:** TIC100 in chloroplast protein import

14 **One sentence summary:** Complementary mutations in TIC100 of the chloroplast inner envelope  
15 membrane cause reductions or corrective improvements in chloroplast protein import, and  
16 highlight a signalling role.

17 The author responsible for distribution of materials integral to the findings presented in this article  
18 in accordance with the policy described in the Instructions for Authors ([www.plantcell.org](http://www.plantcell.org)) is:  
19 Enrique López-Juez ([e.lopez@rhul.ac.uk](mailto:e.lopez@rhul.ac.uk)).

20 **Abstract**

21 Chloroplast biogenesis requires synthesis of proteins in the nucleocytoplasm and  
22 the chloroplast itself. Nucleus-encoded chloroplast proteins are imported via  
23 multiprotein translocons in the organelle's envelope membranes. Controversy  
24 exists around whether a 1 MDa complex comprising TIC20, TIC100 and other  
25 proteins constitutes the inner membrane TIC translocon. The Arabidopsis *cue8*  
26 virescent mutant is broadly defective in plastid development. We identify *CUE8*  
27 as *TIC100*. The *tic100<sup>cue8</sup>* mutant accumulates reduced levels of 1 MDa complex  
28 components and exhibits reduced import of two nucleus-encoded chloroplast  
29 proteins of different import profiles. A search for suppressors of *tic100<sup>cue8</sup>*  
30 identified a second mutation within the same gene, *tic100<sup>soh1</sup>*, which rescues the  
31 visible, 1 MDa complex-subunit abundance, and chloroplast protein import  
32 phenotypes. *tic100<sup>soh1</sup>* retains but rapidly exits virescence, and rescues the  
33 synthetic lethality of *tic100<sup>cue8</sup>* when retrograde signalling is impaired by the *gun1*  
34 mutation. Alongside the strong virescence, changes in RNA editing and the  
35 presence of unimported precursor proteins show that a strong signalling  
36 response is triggered when TIC100 function is altered. Our results are consistent  
37 with a role for TIC100, and by extension the 1 MDa complex, in the chloroplast  
38 import of photosynthetic and non-photosynthetic proteins, a process which  
39 initiates retrograde signalling.

## 40 **Introduction**

41 Chloroplast-containing photosynthetic eukaryotes sustain the biosphere.  
42 Chloroplast biogenesis is a complex process which in plants requires the  
43 involvement of 2000-3000 nucleus-encoded proteins and approximately 80  
44 proteins encoded by the chloroplast's own genome (Jarvis and López-Juez,  
45 2013). The majority of proteins (those which are nucleus-encoded) need to be  
46 imported into the chloroplasts through the double-membrane envelope. This is  
47 achieved by the operation of protein import translocons at the outer and inner  
48 envelope membranes of chloroplasts – TOC and TIC, respectively (Jarvis and  
49 López-Juez, 2013; Nakai, 2018; Richardson and Schnell, 2020).

50  
51 At the outer membrane TOC complex, subunits with GTPase activity act as  
52 receptors for the N-terminal targeting signals of chloroplast-destined  
53 polypeptides, and another subunit, TOC75, acts as a transmembrane import  
54 channel (Jarvis and López-Juez, 2013). At least two versions of the TOC  
55 complex exist, with different client specificities: one contains receptors with a  
56 preference for abundant photosynthetic pre-proteins, while the other favours  
57 import of house-keeping pre-proteins, like those involved in the chloroplast  
58 genetic machinery (Ivanova et al., 2004; Kubis et al., 2004; Jarvis and López-  
59 Juez, 2013). Targeted replacement of TOC receptor proteins has been revealed  
60 as a fundamental determinant of the development of photosynthetic or non-  
61 photosynthetic plastids and of plastid type transitions (Ling et al., 2012; Ling et  
62 al., 2019).

63  
64 The identity of the inner membrane TIC components, in contrast, has been the  
65 subject of considerable debate. Initial studies identified an abundant 110 kDa  
66 protein (Kessler and Blobel, 1996; Lubeck et al., 1996), later named TIC110, and  
67 postulated to be a scaffold coordinating internal chaperones (Inaba et al., 2003)  
68 or, alternatively, the inner membrane import channel (Heins et al., 2002). Another  
69 candidate for the role of inner membrane channel is TIC20 (Chen et al., 2002;

70 Kovacs-Bogdan et al., 2011), and a 1 MDa complex comprising nucleus-encoded  
71 TIC20 and at least three other proteins – including TIC100, TIC56 and  
72 chloroplast-encoded TIC214, but not including TIC110 – has been identified as a  
73 core channel-forming TIC complex (Kikuchi et al., 2013). An alternative form of  
74 TIC20 was shown to occur in root tissue, in the absence of the other components  
75 of the complex. However, the 1 MDa TIC complex model has proven  
76 controversial (de Vries et al., 2015; Nakai, 2015b; Bolter and Soll, 2017; Sjuts et  
77 al., 2017; Richardson and Schnell, 2020). Objections center around the low  
78 abundance of TIC20 compared to TIC110 (Vojta et al., 2004; Kovacs-Bogdan et  
79 al., 2011), the fact that the three additional proteins of the 1 MDa complex are  
80 absent in the grass family (Kikuchi et al., 2013; de Vries et al., 2015), the  
81 observation that the full-length version of TIC56 is dispensable in Arabidopsis  
82 (Kohler et al., 2015; Kohler et al., 2016; Schafer et al., 2019), and data pointing to  
83 other functions for TIC56 and TIC214 (Kohler et al., 2016; Schafer et al., 2019).  
84 The observation of a combined TOC-TIC “supercomplex” which includes TIC20  
85 but also a small fraction of the total TIC110 (Chen and Li, 2017), leaves the issue  
86 of the nature of the channel unresolved.

87

88 Chloroplast development in flowering plants occurs exclusively in the light  
89 (Arsovski et al., 2012), because photoreceptors activate the expression of many  
90 genes for chloroplast-destined proteins (Cackett et al., 2021). A genetic screen  
91 for mutants in which light failed to activate the promoter of the *LHCB1\*2* (*CAB3*)  
92 gene led to the identification of *CAB-underexpressed* (*cue*) mutants (Li et al.,  
93 1995; López-Juez et al., 1998). Among them, *cue8* exhibited a severe phenotype  
94 characterised by reduced plastid development in both dark and light conditions,  
95 and strongly impaired induction of (specifically) photosynthesis-associated genes  
96 by phytochrome photoreceptors (López-Juez et al., 1998; Vinti et al., 2005) linked  
97 to chloroplast-to-nucleus communication (Loudya et al., 2020). Seedlings of *cue8*  
98 display largely normal photomorphogenesis but have leaf rosettes with a  
99 virescent (slow-greening) phenotype. This virescence is due to a cellular

100 correction phenomenon: an "anterograde" (nucleus-to-chloroplast) response  
101 which maintains a juvenile state of plastids, a delay in the transition from the pre-  
102 photosynthetic proplastid to differentiated chloroplast state, manifested in multiple  
103 physical and genetic features, and which allows for an eventual overcoming of  
104 the plastid defect (Loudya et al., 2020). This change is a response to "retrograde  
105 signals" (mediating chloroplast-to-nucleus communication), and can therefore be  
106 described as a "retro-anterograde correction". Interestingly, evidence has  
107 recently accumulated pointing to an involvement of defects affecting the import of  
108 cytosol-synthesised proteins into chloroplasts (Wu et al., 2019; Tadini et al.,  
109 2020), or protein folding or quality control inside the organelle (Tadini et al., 2016;  
110 Wu et al., 2019; Tadini et al., 2020), in the initiation of changes in the cytosol.  
111 Such processes are broadly described as protein homeostasis or "proteostasis",  
112 and their involvement triggers what can be described as a folding stress  
113 response, which may, in turn, cause retrograde signalling to the nucleus (Wu et  
114 al., 2019; Tadini et al., 2020). Indeed, GUN1, a chloroplast pentatricopeptide  
115 repeat protein which plays an important role in retrograde signalling, was shown  
116 to interact with chaperones involved in, or acting after, protein import, with its  
117 absence impairing import under specific conditions (Wu et al., 2019) and causing  
118 some depletion of components of the import machinery itself (Tadini et al., 2020).

119

120 We sought the molecular identity of the *CUE8* gene by positional cloning. We  
121 here report that *cue8* carries a missense mutation affecting TIC100, one of the  
122 components of the 1 MDa TIC complex. Furthermore, a genetic screen for  
123 suppressors of this mutant identified a second, intragenic mutation.

124 Comprehensive analyses of both *tic100<sup>cue8</sup>* and the suppressed mutant (carrying  
125 two mutations in the same gene) demonstrated a significant role for this protein in  
126 chloroplast protein import, which is in turn consistent with such a role for the 1  
127 MDa complex. In spite of the suppressed mutant's recovery in import capacity, it  
128 retained a pronounced early virescence and exhibited strong genetic interaction  
129 with the loss of GUN1. These results, alongside others showing changes in RNA

130 editing and gene expression and the likely occurrence of unimported  
131 polypeptides, highlighted the dramatic impact that changes in TIC100 have on  
132 chloroplast-to-nucleus communication.

133

134

135

136 **Results**

137

138 **Mutation of *CUE8* leads to defects in plastid development in leaves and**  
139 **roots.**

140 The *cue8* mutant was previously identified following mutagenesis of the  
141 pOCA108 reporter-containing line (Figure 1A) (Li et al., 1995). We recently  
142 demonstrated that the virescent, slow-greening phenotype of *cue8* is associated  
143 with reduced chloroplast development in early cotyledons or very young leaf  
144 tissues (in which chloroplasts fail to fill the available cellular space), and by a  
145 gradual recovery of normal chloroplasts (Loudya et al., 2020). We wished to  
146 investigate whether the mutation impacts plastid development beyond leaves,  
147 widely across tissues, and so incorporated a plastid-targeted DsRed fluorescent  
148 protein (Haswell and Meyerowitz, 2006) into the wild type, and then introgressed  
149 the transgene into the *cue8* mutant. The fluorescence signal was substantially  
150 reduced in *cue8*, relative to wild type, both in cotyledon mesophyll cells and in  
151 roots, in which partially-developed chloroplasts were prominent in cells  
152 surrounding the central vasculature (Figure 1B and C). Accordingly, leaf  
153 development and root elongation were both reduced in the mutant (Supplemental  
154 Figure 1A and B). Supplementation of the growth medium with sucrose rescued  
155 the *cue8* root phenotype, in a dose-dependent manner but to an incomplete  
156 extent (Supplemental Figure 1). Thus, we concluded that CUE8 plays a role in  
157 plastid development in non-photosynthetic tissues, as well as in photosynthetic  
158 tissues.

159

160

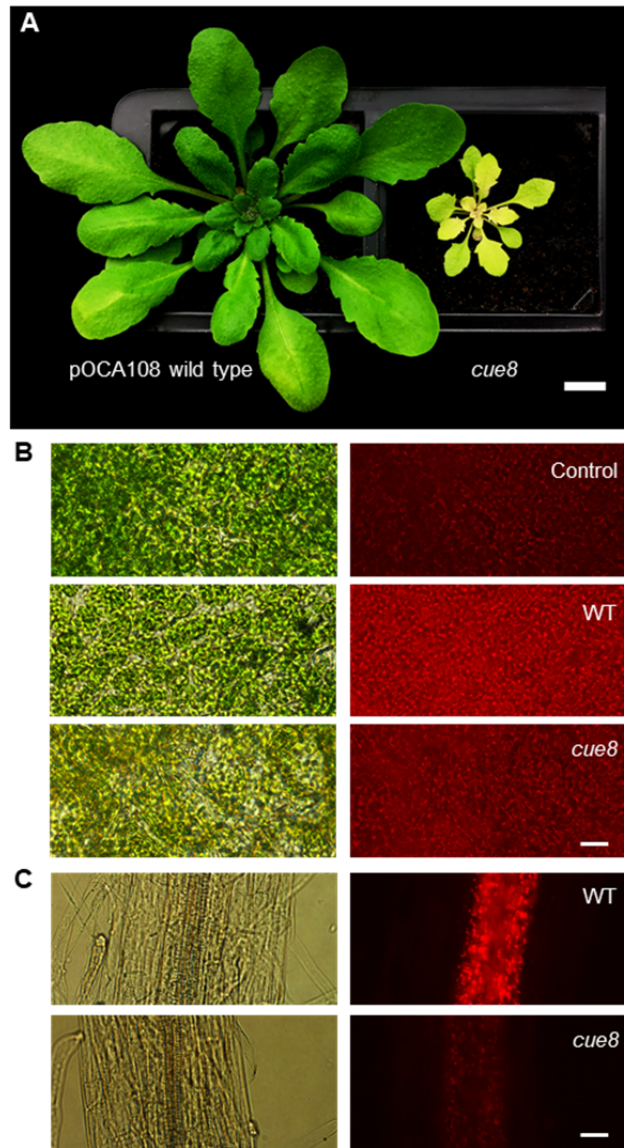

161

162

163

164

165

166

167

**Figure 1. Mutation of *CUE8* causes a delay in plastid development in both aerial and root tissues.** (A) Phenotype of 28-day-old pOCA108 wild type and *cue8* mutant plants. Scale bar 1 cm. (B) Mature cotyledon samples of plants without plastid-targeted dsRed (Control), or dsRed-containing pOCA108 wild type (5 days) or dsRed-containing *cue8* (6 days). (C) Root samples of equivalent seedlings. The same transgene was present in both genotypes, and images of WT and mutant were taken using the same exposure. Scale bar (B and C) 25  $\mu$ m.



168 **Identification of the *CUE8* locus by linkage mapping.**

169 *cue8* and its wild-type progenitor (Li et al., 1995) are lines in the Bensheim  
170 ecotype of Arabidopsis (Figure 1A). We generated two mapping populations for  
171 *cue8* by performing outcrosses to both Landsberg-*erecta* (La-*er*) and Columbia  
172 (Col-0), to take advantage of ecotype polymorphisms (Supplemental Table 1).  
173 The *CUE8* locus was mapped to an 82 kb region of chromosome 5, containing 19  
174 complete open reading frames (Figure 2A, see Materials and methods). A  
175 Transformation-competent Artificial Chromosome (TAC) covering 11 of those  
176 genes was able, when transformed into *cue8*, to complement the mutation  
177 (Supplemental Figure 2 and Supplemental Table 2). A combination of  
178 sequencing of individual candidate genes and assessment of the phenotypes of  
179 T-DNA knockouts (Supplemental Table 2) ruled out 10 of those genes, while we  
180 were unable to identify a viable homozygous mutant for AT5G22640 (only  
181 heterozygous T-DNA-containing plants were recovered). Sequencing of genomic  
182 DNA of *cue8* confirmed the presence of a mutation in this gene resulting in a  
183 G→R amino acid substitution at position 366, just outside one of the protein's  
184 predicted Membrane Occupation and Recognition Nexus (MORN) domains  
185 (Takeshima et al., 2000) (Figure 2A, 5C, Supplemental Table 3). Transformation  
186 of the mutant with a wild-type (pOCA108) cDNA encoded by AT5G22640 under  
187 the control of a constitutive promoter also resulted in complementation (Figure 2B  
188 and C). Thus, we concluded that *CUE8* is AT5G22640, a gene identified  
189 previously as *EMB1211*, due to its embryo-lethal knockout mutant phenotype  
190 (Liang et al., 2010), and, most interestingly, as *TIC100* (Kikuchi et al., 2013),  
191 encoding a component of the putative 1 MDa TIC complex. We hereafter refer to  
192 the mutant allele, and the plant carrying it, as *tic100<sup>cue8</sup>*. Bearing in mind the  
193 nature of the *tic100<sup>cue8</sup>* amino acid substitution, as well as the mutant's virescent  
194 phenotype, which contrasts with the loss of viability caused by a T-DNA insertion  
195 at this locus, we concluded that the *tic100<sup>cue8</sup>* is a hypomorphic allele, carrying a  
196 missense mutation which causes a partial loss-of-function of the gene.

197



198 Several chloroplast protein import components have previously been shown to  
199 have a preferential role in the import of either abundant, photosynthetic proteins  
200 or less-abundant, but essential, plastid housekeeping proteins (Jarvis, 2008).  
201 Having identified *CUE8*, we compared, using publicly-available data (Schmid et  
202 al., 2005), its developmental expression with that of genes representative of  
203 those two functions. The *CUE8/TIC100* gene exhibited (Supplemental Figure 3) a  
204 combined expression pattern: high like *LHCB2.1* in photosynthetic tissues, while  
205 also high like *TOC34* in those tissues rich in meristematic cells, such as the root  
206 tip. Results of a search for co-regulated genes, using two different algorithms  
207 (Supplemental Datasets 1 and 2) were also consistent with *CUE8/TIC100* being  
208 involved early (for example, together with transcription and translation, pigment  
209 synthesis and protein import functions) in the biogenesis of photosynthetic as  
210 well as non-photosynthetic plastids.

211

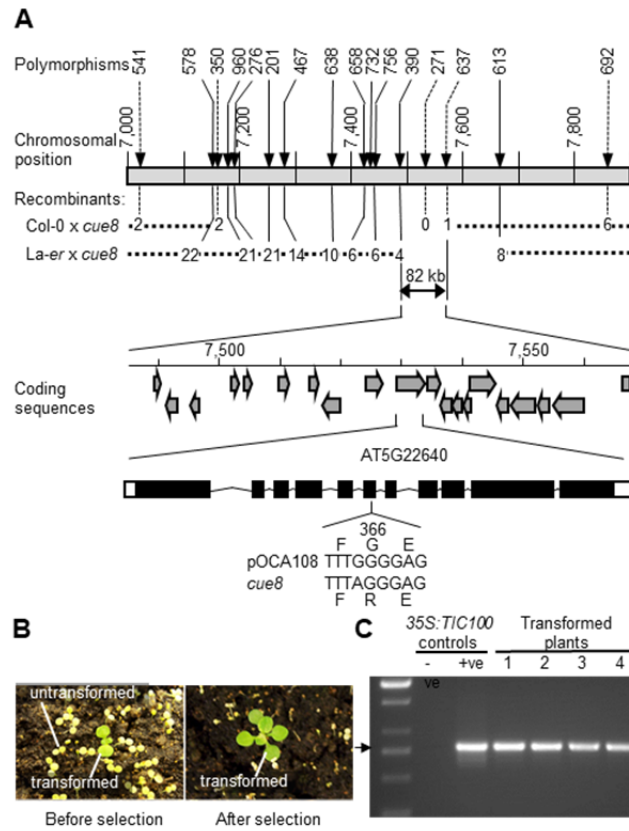

212

213 **Figure 2. Cloning of *CUE8*.** (A) Map-based cloning of the *CUE8* gene, AT5G22640, encoding *TIC100* / *EMB1211*. Upper  
 214 panel: abbreviated name of the polymorphisms used for mapping, position along chromosome 5 (in kb), and number of  
 215 recombinants at those positions identified in the indicated mapping populations. This identifies an 82 kb region, containing  
 216 19 open reading frames (middle panel). A combination of strategies (Supplemental Table 2) identifies AT5G22640  
 217 (*TIC100*) as the *CUE8* locus, whose exon/intron structure is shown. A point mutation (lower panel) results in a single  
 218 amino acid substitution (G366R) in the *TIC100* protein sequence. (B) Complementation of *cue8* with 35S:*TIC100*, carrying  
 219 a *TIC100* cDNA under the control of a 35S promoter. Plants shown before and after the selection of transformants. (C)  
 220 Diagnostic PCR confirming the presence of the 35S:*TIC100* transgene in complemented plants. Positive (+ve) control,  
 221 plasmid DNA harbouring the construct. Negative (-ve) control, DNA from plant prior to transformation.

222

223 **Reduced protein import rate and partial loss of the 1 MDa complex in**  
224 ***tic100<sup>cue8</sup>* chloroplasts.**

225 Taking advantage of the opportunity afforded by the partial loss of function of  
226 TIC100 in *tic100<sup>cue8</sup>*, we carried out *in vitro* import assays with chloroplasts  
227 isolated from well-developed seedlings of the mutant, using a photosynthetic  
228 protein precursor, the Rubisco small subunit (SSU). Four independent  
229 experiments, using developmentally-comparable wild-type and mutant plants  
230 (Figure 3A), revealed that *cue8* mutant chloroplasts import less than one-third of  
231 the amount of pre-protein than the equivalent number of wild-type chloroplasts  
232 (Figure 3B, C).

233

234 To understand more clearly the basis for the protein import deficiency in the  
235 mutant, we analysed the levels of several translocon components by  
236 immunoblotting. Equal amounts of total chloroplast proteins were loaded per  
237 lane. Band intensities for some translocon components, in both the outer  
238 (TOC75) and inner (TIC110, TIC40) envelope membranes, were elevated by  
239 about a third in the *tic100<sup>cue8</sup>* lanes (Supplemental Figure 4). This reflected the  
240 fact that *tic100<sup>cue8</sup>* chloroplasts are, to varying extents, less developed internally  
241 and contain reduced amounts of the major photosynthetic proteins, including  
242 Rubisco and LHCB (López-Juez et al., 1998), relative to wild type, leading to the  
243 relative overloading of envelope components in the *tic100<sup>cue8</sup>* samples when  
244 using equal protein amounts (this also explains the slightly lower amounts of total  
245 protein in the *tic100<sup>cue8</sup>* samples following normalisation according to equal  
246 chloroplast numbers in Figure 3B). Crucially, in spite of this, the level of TIC100  
247 polypeptide was reduced to between one quarter and one eighth that in the wild  
248 type (Supplemental Figure 4) on an equal total chloroplast protein basis, or less  
249 than one eighth when normalized to another envelope protein, TIC40. The  
250 decrease in TIC100 abundance in the mutant was linked to reductions in the  
251 levels of the other components of the 1 MDa complex (TIC20 and the additional  
252 TIC56 and TIC214; Supplemental Figure 4), to between 25 and 50% of wild-type

253 levels when expressed relative to TIC40. These observations are consistent with  
254 the notion that these proteins associate, with the very substantial loss of  
255 *tic100*<sup>*cue8*</sup> preventing others from accumulating normally.

256

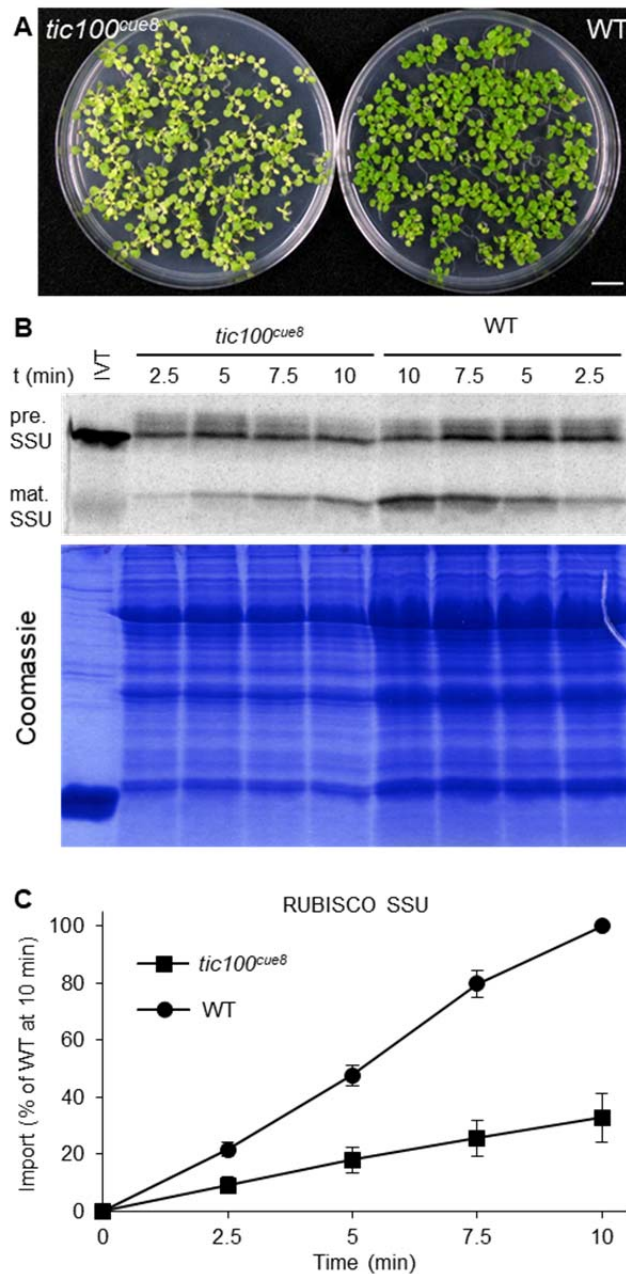

257

258 **Figure 3. Chloroplasts of *tic100<sup>cue8</sup>* exhibit reduced protein import rates.** (A) 13-day-old wild-type and  
259 developmentally-comparable 17-day-old *tic100<sup>cue8</sup>* mutant seedlings, used to isolate chloroplasts for import assays.  
260 Seedlings were grown on 0.5% sucrose. Scale bar: 1 cm. (B) Phosphor screen image of import reactions of *in vitro*-  
261 translated RUBISCO SSU polypeptide (IVT), carried out with equal total numbers of chloroplasts isolated from the  
262 seedlings above. Samples were taken 2.5, 5, 7.5 or 10 min after the start of the reaction. The import reaction converts the  
263 precursor (pre.) into mature polypeptide (mat.) of reduced size. Results from one representative experiment. A  
264 Coomassie-stained total protein gel corresponding to the same experiment is also shown. (C) Quantification of the amount  
265 of mature protein at each time point, normalised relative to the amount of mature protein in WT after 10 min of import.  
266 Average values from four independent experiments. Error bars represent s.e.m. Values for *tic100<sup>cue8</sup>* were significantly  
267 different to those of WT at every time point (Student's t-test, 2-tailed,  $p < 0.05$ ).

268

269

270 **Identification of a suppressor mutation of *tic100<sup>cue8</sup>*.**

271 A search for suppressor mutations of the *ppi1* mutant, defective in the TOC33  
272 subunit of the outer envelope translocon, led to the identification of SP1, a  
273 ubiquitin ligase which remodels the import complexes to control protein import  
274 and plastid development (Ling et al., 2012; Ling et al., 2019). We sought to  
275 deepen our understanding of inner envelope translocation processes by  
276 searching for suppressors of the *tic100<sup>cue8</sup>* mutation. Screening of mutagenised  
277 M2 populations for increased levels of greening led to the identification of a  
278 mutant with a dramatic phenotype, which we named *suppressor of tic100 1, soh1*  
279 (Figure 4A). Backcrossing of *tic100<sup>cue8</sup> soh1* into the *tic100<sup>cue8</sup>* parent resulted in  
280 100% of the F1 (62 seedlings) showing a phenotype which was intermediate  
281 between that of the parents but closer to the *soh1* phenotype (Supplemental  
282 Figure 5A); while self-pollination of the F1 plants yielded 75% (554 out of 699,  
283 Chi-squared  $p=0.19$ ) seedlings with suppressed phenotype, among which about  
284 a third displayed a marginally larger seedling phenotype (these plants  
285 represented a quarter of the total F2 population: 158 out of 699, Chi-squared  
286  $p=0.21$ ). These data indicated that *soh1* is a gain-of-function mutation that  
287 improves greening and growth, and which has a semi-dominant character.

288

289 We have recently shown that the virescent phenotype of *tic100<sup>cue8</sup>* is caused by  
290 early chloroplasts in very young cotyledons being small and unable to fill the  
291 available cellular space (Loudya et al., 2020). In this regard, chloroplasts of 6-  
292 day-old *soh1* seedlings were much closer to those in the wild type (Figure 4B).  
293 Consequently, plastid DNA nucleoids, tightly packed in *tic100<sup>cue8</sup>* as previously  
294 reported (Loudya et al., 2020), appeared much less dense in *soh1* (Figure 4C).  
295 Moreover, total chlorophyll of light-grown seedlings, protochlorophyllide of dark-  
296 grown seedlings, the average size of individual chloroplasts, and the mesophyll  
297 cellular occupancy by chloroplasts (the chloroplast index), which were all reduced  
298 dramatically in *tic100<sup>cue8</sup>*, were largely restored in *soh1* seedlings (Figure 4D-G).

299

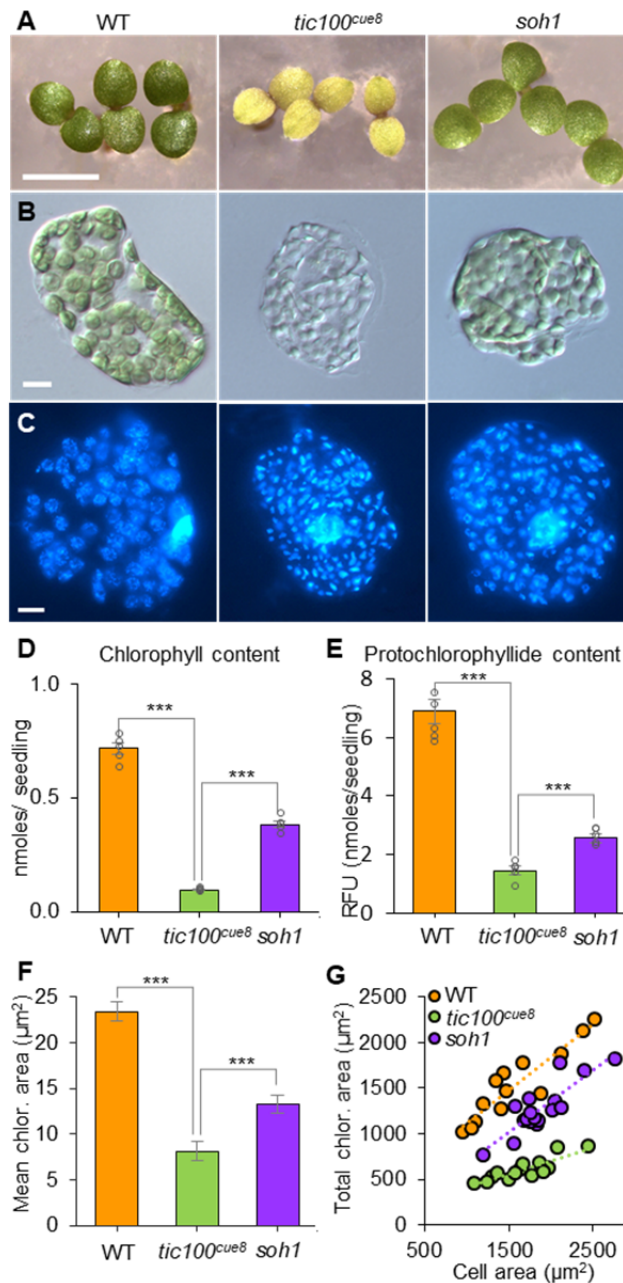

300

301 **Figure 4. Identification of *soh1*, a suppressor mutant of *tic100<sup>cue8</sup>*, and phenotype of young cotyledon cells and**  
 302 **their chloroplasts in wild type, *tic100<sup>cue8</sup>* and *soh1* seedlings. (A)** Five-day (WT) and six-day (*tic100<sup>cue8</sup>* and *soh1*)  
 303 seedlings. Scale bar: 5 mm. **(B)** Individual cells of the three genotypes, of seedlings equivalent to those in **A**, observed  
 304 under DIC microscopy, displaying the different degrees of cell occupancy by chloroplasts. **(C)** Individual cells observed  
 305 fluorescence microscopy following DAPI-staining of double-stranded DNA, revealing both the nuclei and the presence and  
 306 density of nucleoids in individual chloroplasts. Scale bar (**B** and **C**) 10  $\mu\text{m}$ . **(D)** Chlorophyll content per seedling for  
 307 seedlings identical to those in **A**. **(E)** Protochlorophyllide content per seedling (RFU, relative fluorescence units) of 5-day-  
 308 old seedlings of the three genotypes. **(F)** Mean area of individual chloroplasts in cells equivalent to those in **B**. **(G)** Total  
 309 plan area of chloroplasts in a cell plotted against cell plan area, for the three genotypes, including regression lines of best  
 310 fit. The presented values are means, and the error bars (in **D**, **E**) show s.e.m. from five biological replicates, each with at  
 311 least 5 seedlings, or (in **F**) at least 10 individual chloroplasts from each of at least 13 individual cells total, obtained from at  
 312 least four different cotyledons per genotype. For all panels, asterisks above lines denote comparisons under the lines:  
 313 \*\*\* $P < 0.001$  (2-tailed Student's t-test).



314 **Identification of the gene carrying the *soh1* mutation.**

315 We generated a mapping population by backcrossing the suppressor mutant as  
316 originally identified (*tic100<sup>cue8</sup> soh1*, Bensheim ecotype) to the unmutagenised  
317 *tic100<sup>cue8</sup>* parent (also in the Bensheim ecotype). F2 seedlings of unsuppressed,  
318 *tic100<sup>cue8</sup>* phenotype were used for mapping by SHORT READS sequencing  
319 (SHOREmap) (Schneeberger et al., 2009), as described in Supplemental Figure  
320 5B-C. Mapping of the *soh1* mutation identified a region of chromosome 5  
321 (Supplemental Figure 5D) spanning seven genes with mutations in the open  
322 reading frame, and one of these was *TIC100*. Sanger sequencing confirmed the  
323 presence in the *soh1* mutant of both the original *tic100<sup>cue8</sup>* mutation and a second  
324 mutation, which we provisionally named *tic100<sup>soh1</sup>* (Figure 5A-C). Constitutive  
325 expression under the 35S promoter of a *tic100<sup>cue8</sup> soh1* cDNA carrying both of  
326 these mutations in the *tic100<sup>cue8</sup>* mutant plants resulted in T1 plants showing a  
327 suppressed phenotype (Figure 5E); the genotyping of these plants confirmed the  
328 presence of both *tic100<sup>cue8</sup>* (from the endogenous gene) and *tic100<sup>cue8</sup> soh1* alleles  
329 (from the transgene). In contrast, constitutive expression of the *tic100<sup>cue8</sup>* cDNA  
330 under the same promoter in *tic100<sup>cue8</sup>* plants produced only *tic100<sup>cue8</sup>* phenotypes  
331 (Supplemental Figure 6), demonstrating that it was the second mutation, and not  
332 overexpression of the gene, that caused the suppression effect. Therefore, we  
333 concluded that the second mutation was indeed responsible for the suppressed  
334 phenotype, and we hereafter refer to the *tic100<sup>cue8</sup> soh1* double mutant as  
335 *tic100<sup>soh1</sup>* (Figure 5A).

336

337 Analysis of the predicted domain structure of the TIC100 protein by searching in  
338 the Interpro domains database showed that the initial *tic100<sup>cue8</sup>* mutation  
339 occurred immediately outside the C-terminus of the third of three MORN  
340 domains, introducing a basic arginine residue in place of a neutral glycine.  
341 Conversely, the *tic100<sup>soh1</sup>* mutation replaced an arginine residue, within the third  
342 MORN domain (20 amino acids upstream of the *tic100<sup>cue8</sup>* substitution), with a  
343 neutral glutamine residue (Figure 5B, C). Three-dimensional protein structure

344 prediction by the recent, breakthrough AlphaFold algorithm (Jumper et al., 2021)  
345 indeed showed the aminoacids affected by the two substitutions to lie in very  
346 close proximity in space, in regions of confidently predicted structure (Figure 5D),  
347 at one end of a large, highly confidently predicted  $\beta$ -sheet region which includes  
348 the MORN domains.

349

350 **TIC100<sup>cue8</sup> and TIC100<sup>soh1</sup> proteins retain localisation at the chloroplast**  
351 **periphery.**

352 Previous biochemical analyses identified the TIC100 protein as part of the 1 MDa  
353 complex in the inner envelope membrane with a proposed role in pre-protein  
354 import (Kikuchi et al., 2013; Chen and Li, 2017; Richardson et al., 2018). In view  
355 of the protein import defect of the mutant, described above, we asked whether  
356 the *tic100<sup>cue8</sup>* mutation interferes with the localisation of the TIC100 protein, and  
357 whether such an effect might in turn be alleviated by the *tic100<sup>soh1</sup>* mutation.

358 Therefore, we constructed YFP fusion versions of the TIC100 protein in its wild-  
359 type and two mutant forms (the second carrying both mutations). Transient  
360 overexpression of the fusions in protoplasts resulted in some accumulation of all  
361 three proteins in the cytosol of the cells (Supplemental Figure 7), which interfered  
362 with assessment of chloroplast envelope association. However, in protoplasts in  
363 which rupture of the plasma membrane eliminated the background cytosolic  
364 protein (which we interpret to be mislocalised owing to overexpression), TIC100  
365 was clearly observed at the periphery of chloroplasts, possibly with a small  
366 amount of intra-organellar signal; this is consistent with the previous  
367 biochemically-determined localisation. Significantly, neither of the two mutations  
368 altered this character (Figure 5F), and so we concluded that the mutations affect  
369 a property of TIC100 other than its localisation.

370

371

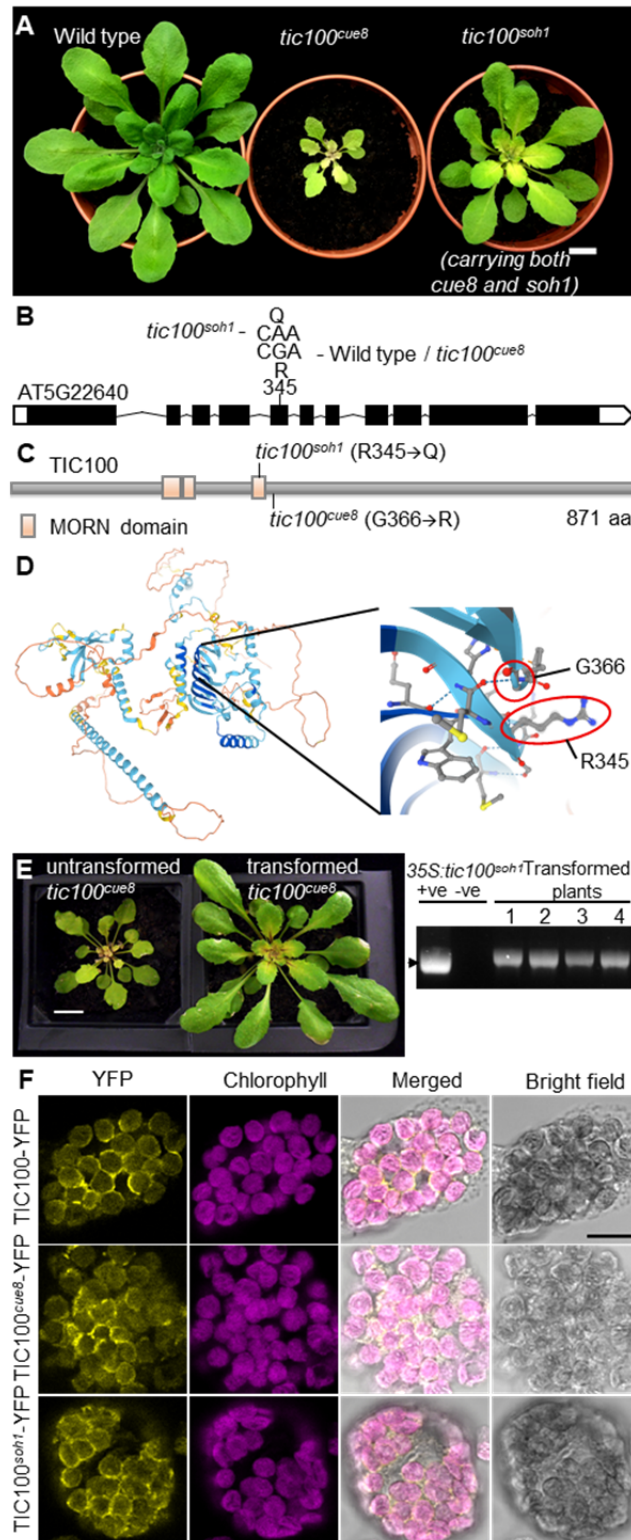

372

373

374 **Figure 5. Cloning of the intragenic suppressor of TIC100 (*soh1*) mutation, phenocopying and localization of**  
375 **TIC100. (A)** Soil grown plants of wild type pOCA108, *tic100<sup>cue8</sup>* (*tic100<sup>cue8</sup>*) and suppressed *tic100<sup>cue8</sup> soh1* double mutants  
376 (*tic100<sup>soh1</sup>*) are shown at 28 days of age. Scale bar: 1 cm. **(B)** Second missense mutation (and resulting substituted  
377 aminoacid position) in the genomic sequence of the *TIC100* gene present in the *tic100<sup>soh1</sup>* mutant and absent in *tic100<sup>cue8</sup>*  
378 or its wild type parent. **(C)** Model of the domain structure of the TIC100 protein, indicating the position of the single  
379 mutation present in *tic100<sup>cue8</sup>*, or the two mutations present in the *tic100<sup>soh1</sup>* double mutant. The MORN domains occupy  
380 positions 219-239, 243-257 and 337-352. **(D)** TIC100 protein structure prediction by Alphafold, showing the position of the  
381 wild type aminoacids affected by the *tic100<sup>cue8</sup>* and *tic100<sup>soh1</sup>* mutations. Light and dark blue represent regions of confident  
382 and highly-confident prediction respectively. **(E)** Phenocopying of the suppressor *soh1* mutant by transformation of the  
383 single *tic100<sup>cue8</sup>* mutant with an over-expressed, double-mutated *tic100<sup>soh1</sup>* coding sequence driven by the 35S promoter  
384 (as seen in 11 independent T1 plants, 4 shown). Plants shown at 30 days of age. Scale bar: 1cm. Gel on the right  
385 confirms the genotype of the transformed plants. “+ve”: positive genotyping control (bacterial plasmid). **(F)** Localisation of  
386 the TIC100 protein, in its wild type, TIC100<sup>cue8</sup> and TIC100<sup>soh1</sup> (double-mutated) forms, to the chloroplast periphery in  
387 transfected protoplasts. Wild-type protoplasts were transfected with constructs encoding wild-type and mutant forms of  
388 TIC100, each one tagged with a C-terminal YFP tag. The protoplasts were analysed by confocal microscopy. Images  
389 represent results of at least two independent experiments (at least 40 protoplasts per genotype) showing the same result.  
390 Scale bar: 10 µm.

391

392

393 ***tic100<sup>soh1</sup>* corrects the protein import defect caused by *tic100<sup>cue8</sup>*.**

394 Next, we asked whether the basis for the suppression of the *tic100<sup>cue8</sup>* phenotype  
395 in the *tic100<sup>soh1</sup>* mutant was a correction of the plastid protein import defect  
396 described earlier. In these experiments, the import of the photosynthetic SSU  
397 pre-protein into equal numbers of chloroplasts isolated from wild-type, *tic100<sup>cue8</sup>*  
398 single-mutant, and *tic100<sup>soh1</sup>* double-mutant plants (Figure 6A, B) was measured.  
399 On this occasion, the results demonstrated a reduction of protein import in  
400 *tic100<sup>cue8</sup>* to approximately 55% of the wild-type level; the smaller reduction in  
401 import seen here, relative to Figure 3, was attributed to the slightly greater extent  
402 of development of the mutant plants on a higher sucrose concentration in the  
403 medium (Supplemental Figure 1). Notably, protein import into the suppressed  
404 mutant chloroplasts was restored almost completely to wild-type levels (over  
405 90%) (Figure 6C, E).

406

407 To further assess the role of TIC100 in relation to functionally different proteins,  
408 we additionally tested the import of the housekeeping plastid RPL11 protein (50S  
409 plastid ribosomal subunit protein). This also allowed us to assess whether  
410 reductions in import capacity in *tic100<sup>cue8</sup>* chloroplasts could simply be an indirect  
411 consequence of differences in the stage of development of mutant chloroplasts,  
412 since SSU and RPL11 have been shown to be preferentially imported by  
413 chloroplasts of younger or older leaves, respectively (Teng et al., 2012). To the  
414 contrary, we obtained very similar results for RPL11 to those we had obtained for  
415 SSU (Figure 6D, F).

416

417 Overall, these protein import data (which were observed across four independent  
418 experiments per pre-protein) revealed a clear import defect in *tic100<sup>cue8</sup>* for two  
419 proteins which display different developmental stage-associated import profiles  
420 (Teng et al., 2012), and which use different types of TOC complexes (Jarvis and  
421 López-Juez, 2013; Demarsy et al., 2014). This was consistent with the gene  
422 expression profile of *TIC100* (Supplemental Figure 3). Notably, this was also

423 consistent with the fact that SSU preprotein was previously shown to physically  
424 associate during import with several components of the 1 MDa complex,  
425 including TIC100, while RPL11 preprotein was found to associate with TIC214  
426 (Kikuchi et al., 2018), Moreover, our results revealed a very pronounced  
427 correction of the import defects seen in *tic100<sup>cue8</sup>* chloroplasts in the *tic100<sup>soh1</sup>*  
428 suppressed mutant.



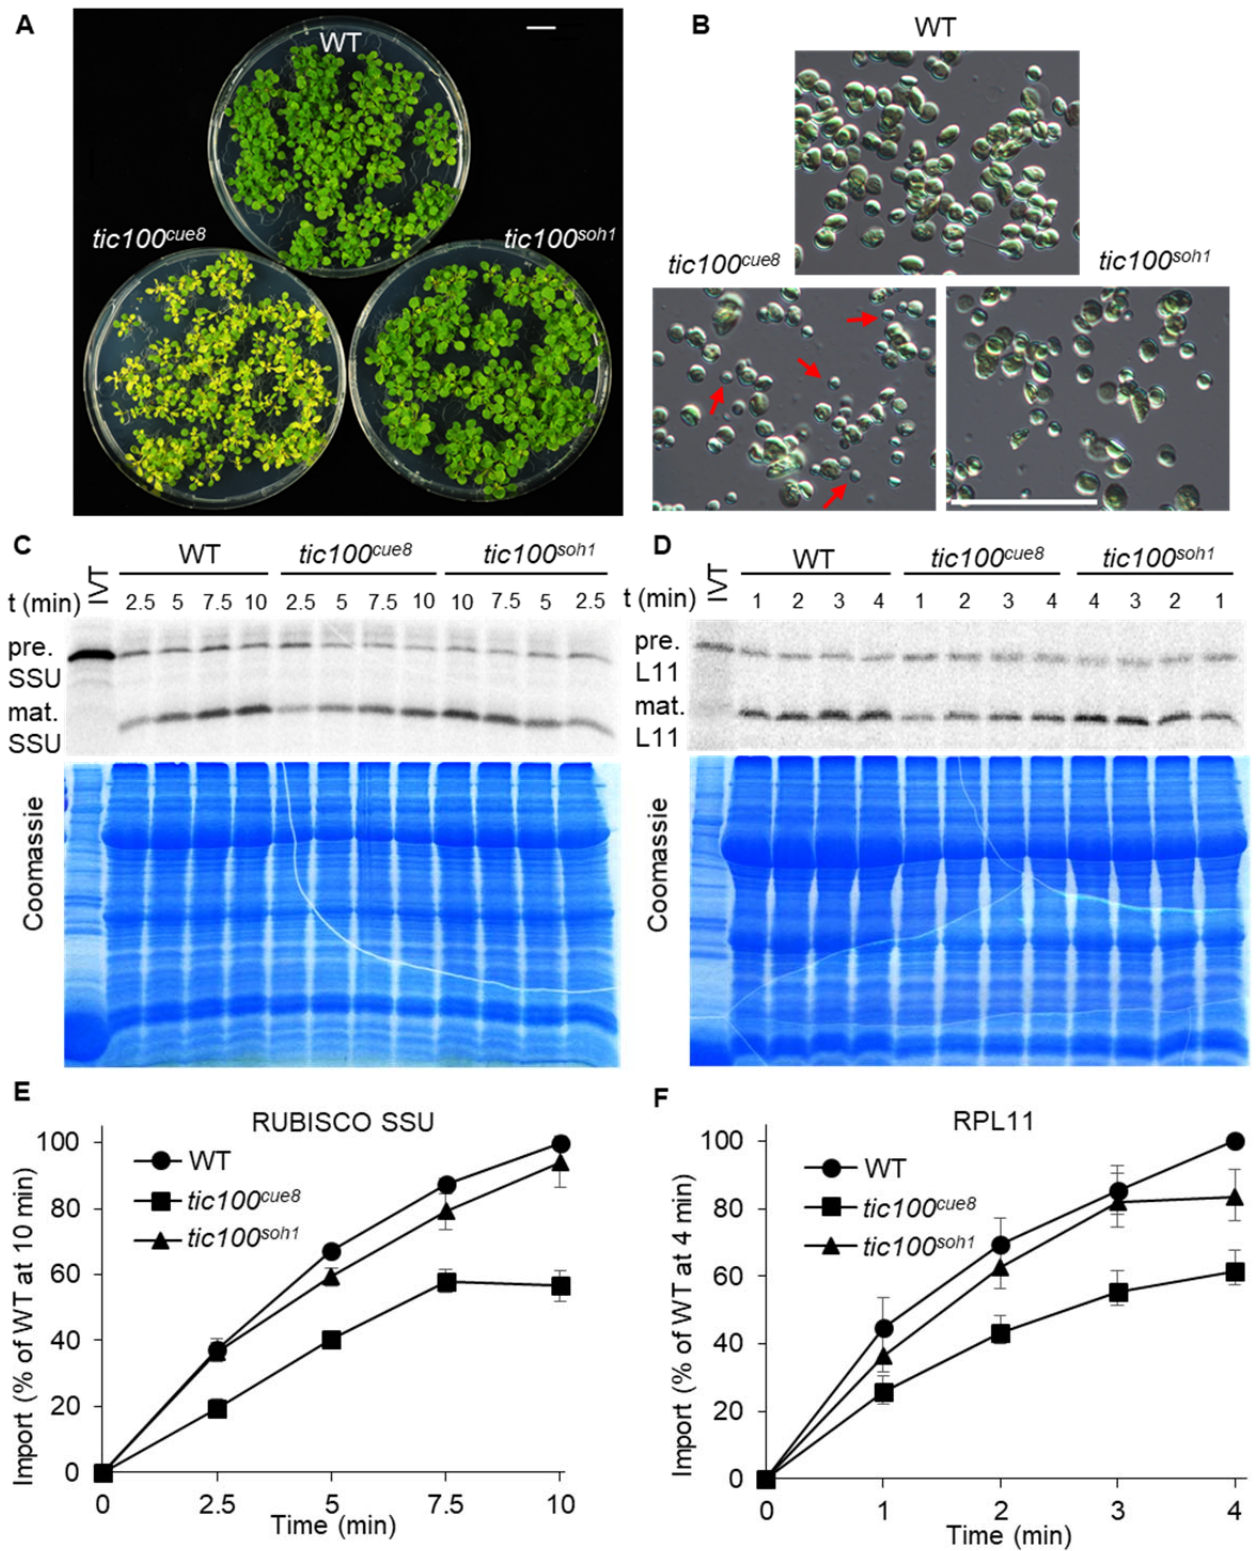

429

430



431 **Figure 6. Chloroplasts of *tic100<sup>cue8</sup>* exhibit reduced import of a photosynthetic and a housekeeping pre-protein,**  
432 **with different age-dependent import profiles, and both defects are suppressed by the second mutation in**  
433 ***tic100<sup>soh1</sup>*. (A)** 13-day-old wild-type, and 17-day-old *tic100<sup>cue8</sup>* and *tic100<sup>soh1</sup>* mutant, seedlings used to isolate chloroplasts  
434 for the import assays. Seedlings were grown on 1% sucrose. Scale bar: 1 cm. **(B)** Examples of chloroplast populations  
435 used for the *in vitro* protein import assays. Occasional small chloroplasts in *tic100<sup>cue8</sup>* are indicated with red arrows. Scale  
436 bar: 50  $\mu$ m. **(C)** Phosphor screen image of import reactions of *in vitro*-translated Rubisco small subunit (SSU) polypeptide  
437 (IVT), carried out with equal numbers of *tic100<sup>cue8</sup>* and wild-type chloroplasts. Samples were taken at the indicated times  
438 after the start of the reaction. The import reaction converts the precursor (pre.) into the mature (mat.) polypeptide of  
439 reduced size. Results from one representative experiment are shown. The lower panel shows the corresponding  
440 Coomassie-stained total protein gel of the same experiment. **(D)** Import of RPL11 into equal numbers of wild type,  
441 *tic100<sup>cue8</sup>* and *tic100<sup>soh1</sup>* chloroplasts. Upper and lower panels as in **C**. Values at every time point were significantly different  
442 for *tic100<sup>cue8</sup>* relative to WT, and for *tic100<sup>soh1</sup>* relative to *tic100<sup>cue8</sup>*. **(E)** Quantitation of at least four independent protein  
443 import assays as that shown in **C**, from four separate chloroplast populations obtained from at least four groups of  
444 independently grown plants. The presented values are means, and the error bars show s.e.m. **(F)** Quantitation of at least  
445 four independent import assays, as that shown in **D**. Values at all time points for SSU and 2, 3 and 4 minutes for RPL11  
446 were significantly different for *tic100<sup>cue8</sup>* relative to WT, and for *tic100<sup>soh1</sup>* relative to *tic100<sup>cue8</sup>* ( $p < 0.05$ , 2-tailed Student's t-  
447 test).  
448  
449

450 ***tic100<sup>soh1</sup>* restores levels of 1 MDa protein components in *tic100<sup>cue8</sup>*.**

451 Given the strong reductions in levels of 1 MDa TIC complex components (but not  
452 of other inner or outer envelope proteins) seen in *tic100<sup>cue8</sup>* mutant chloroplasts  
453 (Supplemental Figure 4), we asked whether the *tic100<sup>soh1</sup>* mutation had corrected  
454 the accumulation of components of the 1 MDa complex. Immunoblot analyses  
455 indicated that this was indeed the case (Figure 7A-C). Analysis of TIC100 protein  
456 using the same chloroplast preparations as used for import assays in Figure 6  
457 showed partial restoration of the level of this protein in the double mutant.  
458 Furthermore, qualitatively similar trends to those seen for TIC100 were observed  
459 for TIC56 and TIC214, but we were unable to quantify TIC20 here due to very  
460 limited availability of the corresponding antibody. In contrast, no such protein  
461 level reduction in *tic100<sup>cue8</sup>*, or restoration in *tic100<sup>soh1</sup>*, was observed for control  
462 housekeeping, non-membrane proteins (HSP70, RPL2); in fact envelope proteins  
463 unrelated to the 1 MDa complex (TIC110, TIC40 and TOC75) appeared elevated  
464 in *tic100<sup>cue8</sup>*, consistent with an enrichment of envelope proteins per unit total  
465 chloroplast protein, as discussed earlier, and accordingly returned to normal  
466 apparent levels in *tic100<sup>soh1</sup>*.

467

468 It could be argued that the reduced accumulation of the 1 MDa TIC might have  
469 been an indirect result from a retrograde signalling impact of the *tic100<sup>cue8</sup>*  
470 mutation, leading to reduced nuclear gene expression and synthesis of  
471 translocon components. Such an explanation is highly unlikely given that we  
472 have previously observed elevated, not reduced, expression of nuclear and  
473 chloroplast-encoded genes for early-expressed, plastid housekeeping proteins in  
474 the mutant (Loudya et al., 2020). This is part of its “pre-photosynthetic, juvenile  
475 plastid” phenotype. In fact, we confirmed here that the expression of nucleus-  
476 encoded genes for 1 MDa TIC components and, especially, of the plastid-  
477 encoded *tic214* gene, were all elevated in *tic100<sup>cue8</sup>* (Figure 7D); the expression  
478 of the control *TOC159* gene was also elevated. Interestingly, and as previously  
479 observed for other elements of the juvenile plastid phenotype (Loudya et al.,

480 2020), a substantial component of the retro-antegrade correction did not  
481 involve GUN1 action, since it occurred in *tic100<sup>cue8</sup>* even in the absence of GUN1  
482 (Supplemental Figure 8).

483

484 Moreover, the expression of *TIC20-IV*, which encodes an alternative form of  
485 TIC20 that functions independently of the 1 MDa complex (Kikuchi 2013), was  
486 also elevated in *tic100<sup>cue8</sup>* (Figure 7D). Thus, we concluded that accumulation of  
487 subunits of the TIC 1 MDa complex is reduced by the *tic100<sup>cue8</sup>* mutation at the  
488 posttranscriptional level, that this occurs in spite of the attempted “retro-  
489 anterograde correction” at the gene expression level brought about by retrograde  
490 signalling, and that the accumulation of TIC 1 MDa complex subunits is partially  
491 restored by the *tic100<sup>soh1</sup>* mutation. Furthermore, a potential compensatory effect  
492 of the *tic100<sup>cue8</sup>* mutation, increasing the expression of *TIC20-IV* encoding an  
493 alternative TIC20 form that acts independently of the 1 MDa complex, is  
494 apparent.

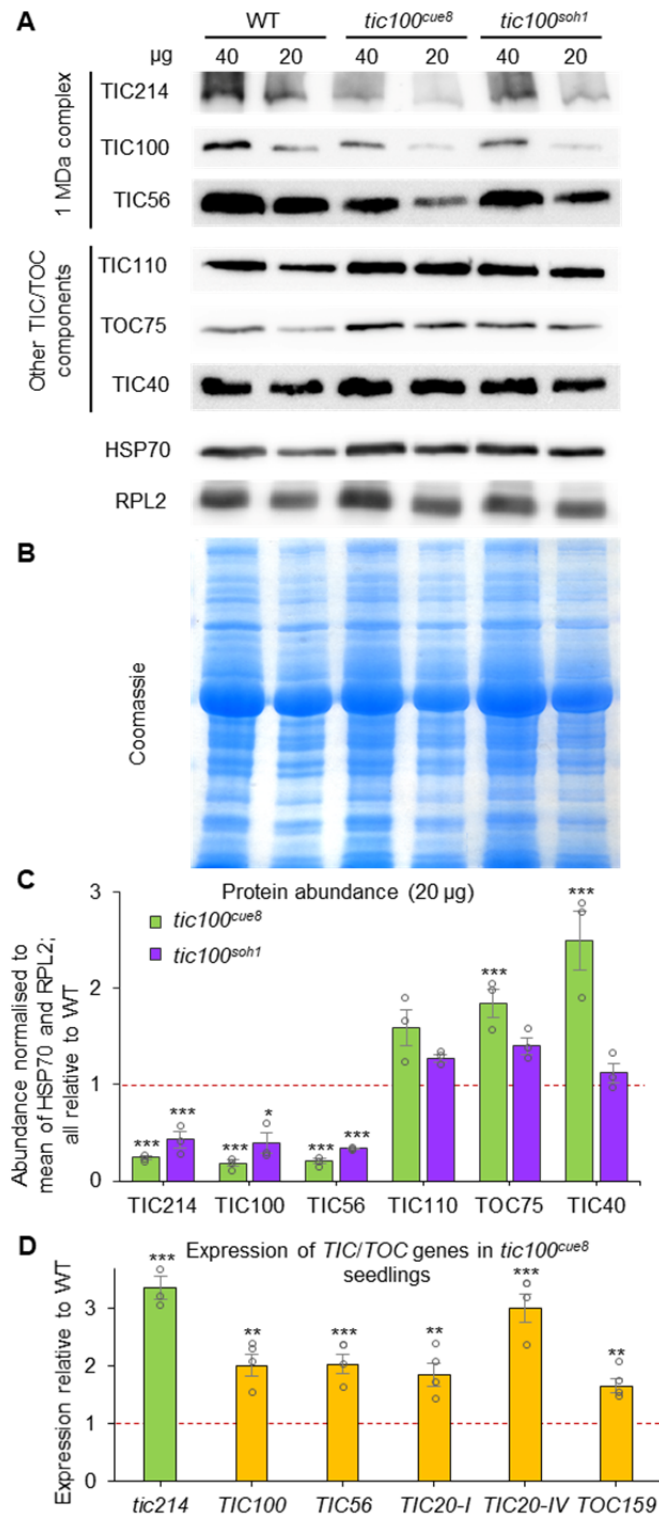

495

496

497 **Figure 7. Chloroplasts of *tic100<sup>cue8</sup>* display decreased levels of 1 MDa complex proteins specifically, and this**  
498 **defect is suppressed by the second mutation in *tic100<sup>soh1</sup>*.** (A) Immunoblot analysis of total chloroplast proteins from  
499 preparations from wild type (13-day-old), and *tic100<sup>cue8</sup>* and *tic100<sup>soh1</sup>* (17-day-old), seedlings (see Figure 6). The amount  
500 of proteins ( $\mu$ g) loaded is indicated above each lane. The antibodies used for the detection of components of the 1 MDa  
501 complex (TIC56, TIC100 and TIC214) or other chloroplast envelope proteins (TOC75, TIC40 and TIC110) are indicated.  
502 Note the reduced amounts of components of the 1 MDa complex, which is apparent despite the increased loading of  
503 envelope proteins (as revealed by the levels of other polypeptides) specifically in the *tic100<sup>cue8</sup>* samples. Very limited  
504 antibody availability precluded probing the chloroplast protein extracts for the levels of TIC20. (B) Coomassie-stained total  
505 protein gel of the same experiment. (C) Quantitation of protein abundance from an analysis of the 20  $\mu$ g samples in three  
506 independent experiments, relative to the mean of HSP70 and RPL2 in each sample, all expressed relative to wild-type  
507 protein levels. The presented values are means, and the error bars show s.e.m. Asterisks represent significance of  
508 difference of each mutant relative to WT (ANOVA followed by Dunnett's test). (D) Expression, measured by quantitative  
509 real-time RT-PCR, of *TIC/TOC* genes in *tic100<sup>cue8</sup>* seedlings similar to those analysed in Figure 3, measured relative to  
510 expression in wild-type seedlings. Note *tic214* is chloroplast-encoded. The presented values are means, and the error  
511 bars show s.e.m. of three RNA samples (biological replicates), each with two technical replicates. Asterisks represent  
512 significance of difference between mutant and WT: \*P < 0.05, \*\*P < 0.01, \*\*\*P < 0.001 (2-tailed Student's t-test). Dotted  
513 lines represent protein levels (C) or expression (D) in WT.  
514

515 ***Interplay between tic100 mutations and retrograde signalling.***

516 We previously observed that while the single *tic100<sup>cue8</sup>* mutation resulted in  
517 virescence, the simultaneous loss of GUN1 (which in itself causes partial  
518 uncoupling of nuclear gene expression from the state of the plastid) was  
519 incompatible with survival – i.e., combination of the *tic100<sup>cue8</sup>* and *gun1* mutations  
520 resulted in synthetic seedling lethality in the double mutants (Loudya et al.,  
521 2020). To further investigate the extent of suppression in *tic100<sup>soh1</sup>*, we analysed  
522 *tic100<sup>soh1</sup> gun1* triple mutants. In contrast to *tic100<sup>cue8</sup> gun1* albino, eventually  
523 lethal mutants, the *tic100<sup>soh1</sup> gun1* triple mutants were very pale but not lethal  
524 (Figure 8A), and indeed they could survive and produce seeds entirely  
525 photoautotrophically under low light conditions. In other words, the synthetic  
526 lethality of *tic100<sup>cue8</sup> gun1* double mutants was suppressed by *tic100<sup>soh1</sup>*.

527

528 Evidence has recently accumulated for a role of altered organelle proteostasis in  
529 chloroplast retrograde signaling (Tadini et al., 2016; Wu et al., 2019; Tadini et al.,  
530 2020). The clear virescence exhibited by *tic100<sup>soh1</sup>*, and its strong, albeit reduced,  
531 genetic interaction with loss of GUN1, led us to ask whether retrograde signalling  
532 was in any way altered by impairment or recovery of TIC100 function. Two  
533 scenarios were in principle possible: In the first, a strong response of reduced  
534 photosynthesis-associated nuclear gene (PhANG) expression might be observed  
535 when TIC100 function is reduced, resulting in the virescence of *tic100<sup>cue8</sup>* and  
536 even *tic100<sup>soh1</sup>* mutants, and the very low PhANG expression in *tic100<sup>cue8</sup>* (Vinti  
537 et al., 2005). In this scenario, GUN1 function, mediating retrograde signalling,  
538 would remain fundamentally unchanged in the mutants. In the second scenario,  
539 the impairment of protein import occurring in *tic100<sup>cue8</sup>*, but barely so in *tic100<sup>soh1</sup>*,  
540 would result in the accumulation of unimported proteins in the cytosol of the  
541 mutants, and this in turn, as proposed by Wu and coworkers (Wu et al., 2019),  
542 would itself cause elevated PhANG expression in spite of the chloroplast  
543 damage, i.e., a *genomes uncoupled (gun)* phenotype. We examined these two  
544 possible, contrasting scenarios by quantifying transcript levels of *LHCB1.2*,

545 *RBCS* and *CA1* – the first two genes classically monitored in retrograde  
546 analyses, and the third gene showing one of the greatest extents of reduction by  
547 treatment with lincomycin (Koussevitzky et al., 2007) – in the presence of a  
548 chloroplast translation inhibitor which triggers a dramatic loss of PhANG  
549 expression. We exposed to lincomycin seedlings of each *tic100* mutant, and of  
550 the *tic100<sup>soh1</sup> gun1* triple mutant. We did not examine *tic100<sup>cue8</sup> gun1*, as such  
551 albino seedlings become impossible to select in the presence of the antibiotic  
552 from the segregating population in which they occur. The results of this analysis  
553 (Figure 8B-C) are clearly consistent with the first scenario: reductions in PhANG  
554 expression were strong in the absence of lincomycin in *tic100<sup>cue8</sup> gun1* double  
555 and in the *tic100<sup>soh1</sup> gun1* triple mutants (Figure 8B), and mild in *tic100<sup>soh1</sup>*. The  
556 reductions in the double mutant were not due to the *gun1* mutation having lost its  
557 associated “uncoupled” phenotype, but rather to the very strong chloroplast  
558 defect (manifested as a greening defect) in the double. This was shown by the  
559 fact that in *tic100<sup>soh1</sup> gun1* PhANG expression, particularly that of *CA1*, was  
560 clearly uncoupled, i.e., much less reduced by lincomycin than it was in the wild  
561 type (Figure 8C). We concluded that, as anticipated, *tic100<sup>cue8</sup>* is not a *gun*  
562 mutant. We also concluded that the capacity of GUN1 to initiate retrograde  
563 communication remains strong in *tic100<sup>soh1</sup>*, and that it can therefore explain the  
564 retained, pronounced virescence.

565

566 PhANG expression changes, in particular in seedlings grown on lincomycin, have  
567 been attributed to the presence of unimported precursor proteins, which can be  
568 detected in whole-cell and cytosolic extracts of such antibiotic-treated plants (Wu  
569 et al., 2019; Tadini et al., 2020). Such precursors have also been detected in  
570 *gun1* even in the absence of antibiotic (Tadini et al., 2020), and it was reasonable  
571 to speculate that they might be also detectable in the *tic100* mutants. We  
572 examined this through immunoblot analysis of the FtsH2 protein, a thylakoid-  
573 associated chaperone for which high molecular weight (HMW) bands have been  
574 previously observed (Tadini et al., 2020) using the same antibody. The HMW



575 bands were previously shown to represent cytosolic, unimported precursors by  
576 cellular fractionation and by the construction and examination of FtsH2-GFP  
577 fusion proteins. Our results (Figure 8D) confirmed that the level of mature FtsH2  
578 protein is much reduced in extracts of lincomycin-treated seedlings. Furthermore,  
579 the antibody could detect the presence of the same HMW bands (unimported  
580 protein) in extracts of seedlings grown in the presence of the antibiotic, and also  
581 in those of mutant seedlings in its absence, an observation which is consistent  
582 with a chloroplast protein import defect in both cases.

583

584

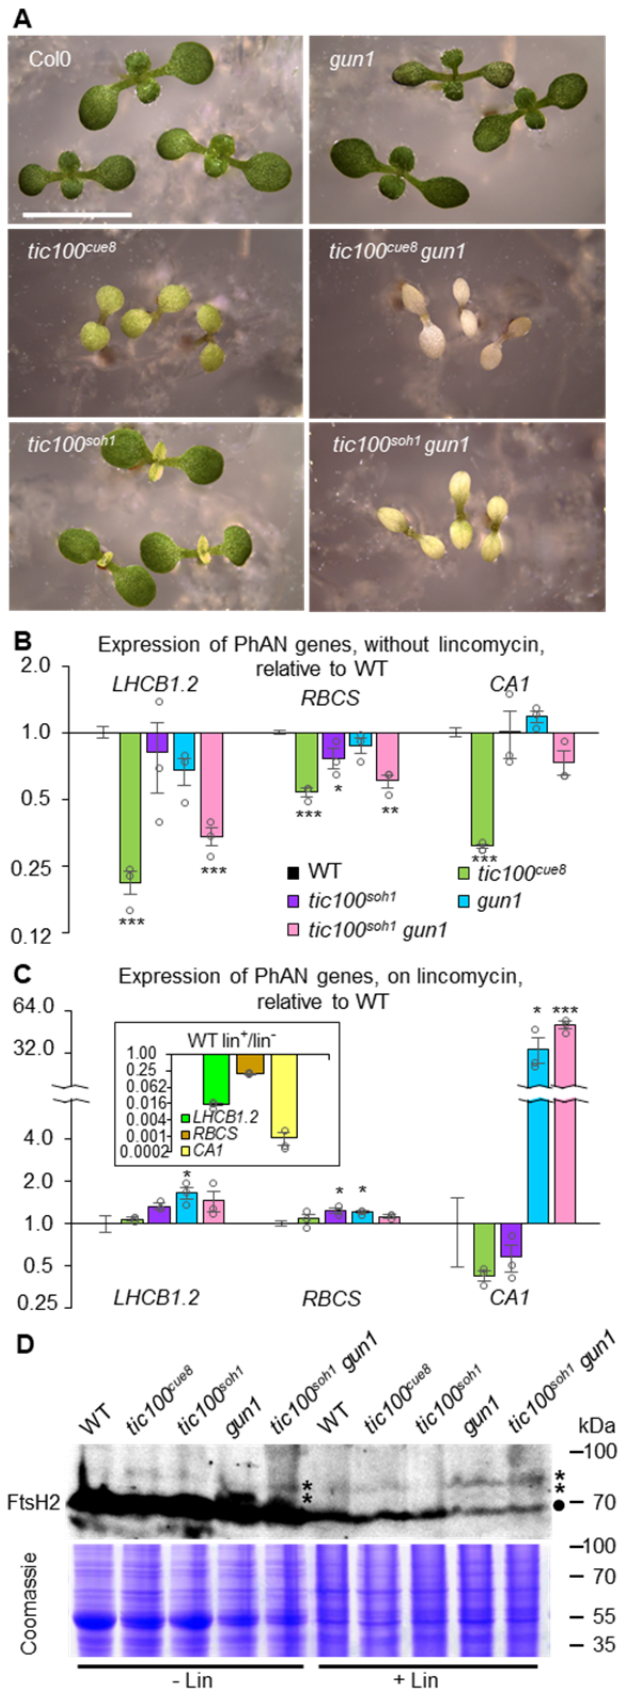

586

587 **Figure 8. The *tic100<sup>soh1</sup>* mutation suppresses the synthetic seedling lethality of *tic100<sup>cue8</sup>* in combination with**  
588 ***gun1*, while *gun1* retains its “uncoupled” phenotype and unimported FtsH2 precursors can be detected in the *tic***  
589 **mutants. (A)** Phenotype of 7-day-old seedlings of the genotypes indicated. *tic100<sup>cue8</sup> gun1* double mutants exhibit  
590 eventual seedling lethality. Scale bar: 5 mm. **(B, C)** Photosynthesis-associated nuclear (PhAN) gene expression in the  
591 absence **(B)** or presence **(C)** of lincomycin in the genotypes indicated. Asterisks denote significance of difference between  
592 mutant and WT as indicated for Figure 7D. The inset compares the phenotype of the wild type grown on lincomycin with  
593 that in its absence. Differences for all three genes exhibited  $P < 0.001$ . **(D)** Immunoblot detection of higher molecular  
594 weight bands, previously shown to represent unimported, cytosolic precursors (asterisks) of chloroplastic FtsH2 (circle), in  
595 the presence or absence of lincomycin, in the genotypes indicated.

596

597

598 **Editing of chloroplast mRNA is altered in *tic100<sup>soh1</sup> gun1* seedlings in a**  
599 **manner consistent with the juvenile plastid phenotype.**  
600 RNA editing occurs for many chloroplast transcripts, and it has been previously  
601 demonstrated that growth of seedlings on norflurazon (which blocks carotenoid  
602 synthesis) or lincomycin, and the concomitant disruption of chloroplast  
603 development, results in changes in the extent of editing of different chloroplast  
604 transcripts (Kakizaki et al., 2012). Importantly, such changes, involving both  
605 increases and decreases in editing, were also observed in plants defective in the  
606 TOC159 outer membrane translocon receptor (Kakizaki et al., 2012). They were  
607 also seen in *tic100<sup>cue8</sup>* and, even more dramatically, *tic100<sup>cue8</sup> gun1* (Loudya et  
608 al., 2020); and they involved increased editing of *rpoC1*, encoding a subunit of  
609 the chloroplast RNA polymerase, and decreased of *ndhB*, encoding a  
610 photosynthetic electron transport protein. We interpreted such changes, not as  
611 evidence of a direct role of CUE8 (TIC100) in editing, but as part of the “juvenile  
612 plastid” phenotype of the mutants. That interpretation is consistent with the  
613 existence of two phases of organelle biogenesis: an early, “plastid development”  
614 phase (photosynthesis-enabling but pre-photosynthetic, involving expression of  
615 the chloroplast genetic machinery), and a later, “chloroplast development” phase  
616 involving photosynthetic gene expression (as seen particularly clearly in  
617 developing cereal leaves: (Chotewutmontri and Barkan, 2016; Loudya et al.,  
618 2021). We asked whether this aspect of the *tic100<sup>cue8</sup>* phenotype had also been  
619 suppressed by *tic100<sup>soh1</sup>*. This was indeed the case (Figure 9): the extent of  
620 editing of *rpoC1* and *ndhB* transcripts was indistinguishable between *tic100<sup>soh1</sup>*  
621 and the wild type (or *gun1*). In contrast, editing was increased for *rpoC1*, and  
622 reduced for *ndhB*, in the *tic100<sup>soh1</sup> gun1* double mutant, which we again interpret  
623 as a more juvenile state of chloroplast development caused by the combination  
624 of the mild loss of import capacity and the simultaneous loss of GUN1 function.

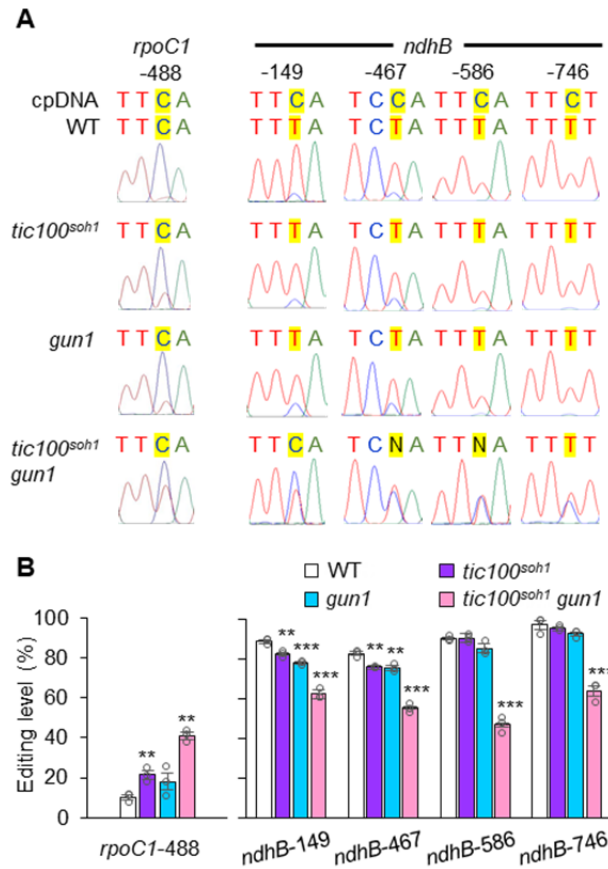

630

631

**Figure 9. Editing of chloroplast mRNA is increased for the transcripts of *rpoC1* and decreased for those of *ndhB* in *tic100<sup>soh1</sup> gun1* seedlings. (A) Representative sequence electropherograms of cDNA generated from cDNA of the genotypes indicated. The original, genomic cpDNA sequence is indicated at the top. (B) Quantitation of the degree of editing of the two plastid mRNAs shown in (A), averaged for three independent cDNA preparations from different seedling samples per genotype. Asterisks denote significance of difference between mutant and WT as indicated for Figure 7D.**

632

633

634

## 635 Discussion

636 The nature of the proteins imported into plastids clearly determines plastid type  
637 and functions, and the identity of the import receptors even influences whole-  
638 plant performance in the face of stress. This underscores the importance of  
639 questions concerning the exact composition of the protein translocons. Indeed,  
640 the identity of the inner membrane TIC machinery has been the subject of much  
641 debate, particularly concerning the identity of the channel and the import motor  
642 (de Vries et al., 2015; Nakai, 2015b; Bolter and Soll, 2017; Sjuts et al., 2017;  
643 Schafer et al., 2019; Nakai, 2020; Richardson and Schnell, 2020). The  
644 serendipitous identification of *cue8* as a hypomorphic allele of *TIC100* provided  
645 an opportunity to begin addressing one such area of controversy. Knockout  
646 mutants of *TIC100/EMB1211* (a component of TIC 1 MDa complex) suffer from  
647 severe embryo development defects, leading to very early seedling lethality  
648 (Liang et al., 2010; Kikuchi et al., 2013). Attempts have previously been made to  
649 address the role of the 1 MDa complex by assessing the import characteristics of  
650 the seedling-lethal knockout mutant *tic56-1*, by proteomically analysing  
651 chloroplast-targeted proteins in such seedlings (Kohler et al., 2015). However  
652 such analysis is indirect and cannot, by definition, reveal differences in import  
653 rate, since seedlings are examined after lengthy *in vitro* culture. A second mutant,  
654 *tic56-3*, expresses a truncated TIC56 protein and has a mild phenotype, allowing  
655 the execution of *in vitro* assays to determine chloroplast protein import rates  
656 (Kikuchi et al., 2013; Kohler et al., 2015). Perhaps owing to different growth or  
657 chloroplast preparation conditions, those experiments did (Kikuchi et al., 2013) or  
658 did not (Kohler et al., 2015) observe reduced import rates in the mutant. In fact,  
659 one analysis reported very low levels of 1 MDa complex subunits overall in the  
660 *tic56-3* mutant, and failed to detect TIC100 at all (Schafer et al., 2019), while in  
661 the same mutant TIC100 had previously been readily observable (Kikuchi et al.,  
662 2013). Understandably, it has been difficult to reach consensus based on data  
663 obtained from such genotypes.

664

665 An alternative approach may help to provide a resolution. Informative *in vitro*  
666 protein import rate assays were readily performed in the current study using the  
667 chloroplasts of *tic100<sup>cue8</sup>*, which are severely impaired in TIC100 accumulation  
668 due to the *tic100<sup>cue8</sup>* mutation. Our data demonstrated a clear reduction in the  
669 efficiency of protein import into mutant chloroplasts, which cannot be explained  
670 simply by their reduced size or extent of development. Importantly, we have  
671 previously observed a physical and gene expression phenotype consistent with a  
672 juvenile state of plastid development in *tic100<sup>cue8</sup>* plastids (Loudya et al., 2020),  
673 and it is well known that plastids of young plants generally achieve greater, not  
674 inferior, import efficiencies (Dahlin and Cline, 1991). The use of two different  
675 preproteins with different age-dependency of import profiles (Teng et al., 2012;  
676 Chu et al., 2020), both of which exhibited reduced import in *tic100<sup>cue8</sup>*, indicated  
677 that the import reduction was not an indirect consequence of an altered  
678 developmental stage of the mutant organelles. On the contrary, the reduced  
679 protein import seen in *tic100<sup>cue8</sup>* chloroplasts provided a clear molecular  
680 explanation for the mutant's strongly virescent phenotype; while the increased  
681 rate of protein import seen in *tic100<sup>soh1</sup>* chloroplasts explained the reduction of  
682 this virescence. We should stress that the suppressor mutation present in  
683 *tic100<sup>soh1</sup>* is unlikely to, in itself, have a positive impact on TIC100 function. It  
684 rather removes a native positive charge present in very close proximity to the  
685 additional positive charge introduced by the *tic100<sup>cue8</sup>* mutation. The suppressor  
686 mutation is therefore likely to have removed an electrostatic repulsion present in  
687 the *tic100<sup>cue8</sup>* mutant protein, which allowed the conformation of TIC100 to return  
688 to a mildly-impaired state, close to its native one.

689

690 The link between the abundance of TIC100 and that of its putative 1 MDa  
691 complex partners, in both *tic100<sup>cue8</sup>* and the intragenic suppressor mutant  
692 *tic100<sup>soh1</sup>*, is consistent with the existence of this complex. Furthermore, the  
693 protein accumulation profile data revealed a correlation between protein import  
694 rates and 1 MDa complex protein levels: decreased (*tic100<sup>cue8</sup>*) or increased



695 (*tic100<sup>soh1</sup>*) protein import rates were observed as subunits of the complex  
696 decreased (*tic100<sup>cue8</sup>*) or increased (*tic100<sup>soh1</sup>*), in a genetically-determined  
697 manner. The data further showed that some loss of the subunits, as seen in  
698 *tic100<sup>soh1</sup>*, can be tolerated with minimal deleterious impact on protein import at  
699 the chloroplast-containing seedling stage; an equivalent phenomenon could  
700 potentially explain some of the previous conflicting observations on *tic56-3*. Thus,  
701 our data are consistent with the existence of the TIC100-containing 1 MDa  
702 complex and with it having a role in protein import. Our results also confirm the  
703 need for the complex for the normal import of different types of pre-proteins,  
704 exemplified by Rubisco SSU, a model photosynthetic protein, and RPL11, a non-  
705 photosynthetic protein. Nonetheless, we emphasise that the data presented here  
706 do not in any way rule out an important role for TIC110 in protein import; for  
707 example, this protein may function at a later stage in the import process, by  
708 providing a scaffold for the coordination of stromal chaperones as previously  
709 proposed (Inaba et al., 2003; Jarvis and López-Juez, 2013; Tsai et al., 2013;  
710 Richardson and Schnell, 2020).

711

712 Among the difficulties raised concerning the proposed role of the 1 MDa complex  
713 in protein import, one is of a phylogenetic nature: the absence of several of the  
714 complex's main components from the grass family of monocots (de Vries et al.,  
715 2015; Bolter and Soll, 2016). In contrast, recent evidence strongly supports the  
716 function of the complex in a chlorophyte alga (Ramundo et al., 2020). It has been  
717 argued that an alternative form of the TIC20 translocon may operate in grasses,  
718 and that this utilises orthologues of TIC20-IV which is expressed and presumably  
719 active in roots of Arabidopsis (Kasmati et al., 2011; Nakai, 2015a). In this light, it  
720 is worth noting that the developmental impairment seen in roots of *tic100<sup>cue8</sup>* was  
721 not as pronounced as that observed in shoot meristem-derived tissues,  
722 suggesting a reduced need for TIC100 in the roots compared to shoots.  
723 Interestingly, we observed in *tic100<sup>cue8</sup>* a three-fold increase in expression of  
724 *TIC20-IV*. This may be a compensation for the loss of function of TIC20-I that

725 occurs in the absence of its 1 MDa partners, as the level of expression of *TIC20-I*  
726 is four-fold higher than that of *TIC20-IV* in emerging seedling cotyledons and six-  
727 fold higher in young leaves (Klepikova et al., 2016). *TIC20-IV*, independent of the  
728 1 MDa complex, might have also escaped the obvious posttranscriptional  
729 regulation we observed for components of the complex in the *tic100<sup>cue8</sup>* mutant.  
730 Nevertheless we do not believe that *TIC20-IV* could fully compensate for defects  
731 in 1 MDa complex, given the lethality of complex knockout mutants. It is apparent  
732 that there are some unquestionable differences between grasses and the  
733 majority of other flowering plant groups in terms of chloroplast biogenesis in  
734 leaves. For example, while the greening of dicot leaf primordia is noticeable from  
735 the very youngest stages, the greening of grass leaves occurs over a longer  
736 developmental period. Differences have also been seen for otherwise important  
737 components involved in organelle biogenesis; for example grass family genomes  
738 contain genes for one chloroplast-targeted and one mitochondrion-targeted RNA  
739 polymerase, but no gene for a protein targeted to both, whereas dicots do carry  
740 such a dual-targeted enzyme (Borner et al., 2015).

741

742 At present we can only speculate on the specific role of *TIC100* within the 1 MDa  
743 complex. The nature of the *soh1* mutation highlighted the importance of at least  
744 one of the three recognised MORN domains in the protein. Such domains have  
745 been shown to be important in other proteins for membrane association and for  
746 association with specific lipids (Takeshima et al., 2000). Previous experiments  
747 (Kikuchi et al., 2013) have revealed that this protein, like *TIC56*, most likely  
748 occupies an intermembrane space position associated with the inner envelope  
749 membrane, while *TIC20* (the protein with channel properties (Kovacs-Bogdan et  
750 al., 2011)) and *TIC214* are integral membrane proteins. Our study also confirmed  
751 a localisation consistent with envelope association for *TIC100*, and one may  
752 speculate that this association is partly mediated by the MORN domains.  
753 However, our confocal microscopy analysis did not reveal any change in  
754 localisation in the *TIC100<sup>cue8</sup>* and *TIC100<sup>soh1</sup>* mutant proteins. Therefore, we

755 interpret that the mutations either affect or rescue some other aspect of TIC100  
756 function, such as interactions with other members of the 1 MDa complex to  
757 promote complex stability.

758

759 A role (possibly an additional one) for TIC56 in chloroplast ribosome assembly  
760 has been reported, and mild translation inhibition phenocopies many aspects of  
761 the *tic56-3* phenotype (Kohler et al., 2016). These observations have been raised  
762 as an objection against the involvement of the TOC56 protein, and by extension  
763 of the 1 MDa complex, in protein import. However, intriguingly, such translation  
764 inhibition also phenocopies the phenotype caused by the loss the receptor  
765 protein TOC159, which has an extremely well established role in import (Kohler  
766 et al., 2016). Reduced accumulation of two import-related but chloroplast-  
767 encoded proteins, TIC214 and Ycf2/FtsHi – the latter a subunit of a putative  
768 import motor (Kikuchi et al., 2018) – might explain such similarities.

769

770 Intriguingly, *tic100<sup>soh1</sup>* exhibited almost complete rescue of protein import rates  
771 and of greening in fully-developed leaf tissue, and yet it still displayed a  
772 pronounced, early virescence phenotype. This virescence is consistent with a  
773 strong early impact on plastid-to-nucleus communication (a strong early  
774 retrograde signal, should the signal be a negative regulator of photosynthetic  
775 gene expression; or a strong absence of one, should the signal be a positive  
776 regulator). Indeed, the *tic100<sup>soh1</sup> gun1* double mutant was very severely  
777 greening-deficient, although not seedling lethal. Combined loss of TOC159 and  
778 GUN1 has also been reported to have severe consequences (in this case,  
779 seedling lethality) (Kakizaki et al., 2012). A number of important connections  
780 between GUN1 and the chloroplast protein import apparatus have recently been  
781 uncovered. *gun1* mutants lose subunits of the import translocons, including  
782 TIC100, in response to mild inhibition of chloroplast translation, to a greater  
783 extent than the wild type does (Tadini et al., 2020). A 50% reduction in levels of  
784 import translocon subunits in *gun1*, observed on antibiotic-free medium (Tadini et

785 al., 2020), could have made seedlings somewhat more sensitive to the defects  
786 brought about by the *tic100* mutations. However, that cannot fully explain the  
787 very strong genetic interactions between the respective mutations, reaching  
788 seedling lethality in the case of *tic100<sup>cue8</sup> gun1*. *gun1* also causes mild but  
789 synergistic decreases in import rates in a mutant defective in chloroplast  
790 proteostasis, and GUN1 physically associates with chloroplast chaperones that  
791 act in protein import (Wu et al., 2019). Both of those studies (Wu et al., 2019;  
792 Tadini et al., 2020) demonstrated the accumulation of unimported preproteins in  
793 the wild type in the presence of lincomycin, and in *gun1* even in its absence. We  
794 observed HMW bands of FtsH2 that likely represent such unimported  
795 preproteins, and could particularly detect such bands in young seedlings of the  
796 mutant *tic100* genotypes, further supporting the import defects occurring in them.  
797 (Wu et al., 2019) also observed the emergence of a cellular folding stress  
798 response in the cytosol of chloroplast proteostasis mutants, consistent with the  
799 presence of such unimported proteins. We should note, though, that our  
800 evidence is consistent with the accumulation of unimported preproteins in the  
801 cytosol playing a major signalling role which results in the reduction, not the  
802 maintenance, of PhANG expression. The reduction in PhANG expression in  
803 response to impairment of TIC100 function particularly in *tic100<sup>cue8</sup>*, or to  
804 exposure to lincomycin, both of which may or do lead to preprotein accumulation,  
805 is consistent only with such a negative role. Therefore, our data do not support  
806 this aspect of the previously proposed model (Wu et al., 2019), of a role for  
807 increased accumulation of preproteins in elevating PhANG expression and  
808 therefore being the cause of the *gun* phenotype in the *gun1* mutant. We also did  
809 not observe a *gun* phenotype in *tic100<sup>cue8</sup>*, nor, in fact, was a *gun* phenotype  
810 observed in *toc33 (ppi1)*, *toc75-III-3* and *tic40-4* mutants (Wu et al., 2019). Our  
811 data support a loss of protein import at the inner envelope bringing about a  
812 reduction in PhANG expression and triggering a retro-antegrade delay in  
813 chloroplast development which requires GUN1 and, by allowing gradual  
814 correction of the defect, has adaptive value (Loudya et al., 2020). Our previous

815 and current data on RNA editing in *tic100* mutants also support the notion that  
816 the shifts in degree of RNA editing occurring for different chloroplast transcripts  
817 also constitute part of such a retro-anterograde correction.

818

819 Taking these observations together, it is becoming apparent that the status of  
820 organelle protein import – particularly at the inner envelope membrane, mediated  
821 by the 1 MDa TIC complex – and protein homeostasis are critically interlinked  
822 with intracellular communication, and monitoring them is a critical function of  
823 chloroplast retrograde signalling, and of the GUN1 protein specifically. According  
824 to our observations, and consistently with previous ones (Kubis et al., 2003),  
825 impaired protein import reduces PhANG expression. How GUN1 relays  
826 information of changes in import status appears to remain unresolved, and  
827 warrants future exploration.

828

829

830

831 **Methods**

832

833 **Plant material and growth conditions**

834 The *Arabidopsis thaliana cue8* mutant (López-Juez et al., 1998; Vinti et al., 2005)  
835 and its wild type pOCA108, in the Bensheim ecotype, have been described. The  
836 *gun1-1* mutant, in the Col-0 ecotype, was previously described (Susek et al.,  
837 1993).The *cue8* and *soh1* mutations were backcrossed into Col-0 for double  
838 mutant analysis as described (Loudya et al., 2020). The generation of the *soh1*  
839 mutant is described below. Plants were grown in soil under 16 h photoperiods  
840 and a fluence rate of  $180 \mu\text{mol m}^{-2} \text{s}^{-1}$ , and seedlings grown *in vitro* in MS media  
841 supplemented with 1% sucrose, unless otherwise indicated (Supplemental Figure  
842 1) under continuous white light, at a fluence rate of  $100 \mu\text{mol m}^{-2} \text{s}^{-1}$ , as  
843 previously described (López-Juez et al., 1998; Loudya et al., 2020). Genotyping  
844 of the individual mutations (following gene identification), individually or for  
845 double mutant generation, used PCR followed by restriction digestion  
846 (Supplemental Table 4).

847

848 **Analysis of plastid development**

849 Wild type and *cue8* lines carrying the DsRed reporter gene targeted to  
850 chloroplasts (Haswell and Meyerowitz, 2006) were identified following a cross  
851 and selected to homozygosity. Cotyledons and roots from *in vitro*-grown  
852 seedlings (7-day-old) were mounted on slides and observed using a Nikon  
853 (Kingston upon Thames, UK) Eclipse NI fluorescence microscope, x20 Plan Fluor  
854 objective and Texas Red filter block. Cotyledons of non-DsRed, negative control  
855 seedlings were examined to confirm that the majority of the fluorescence signal  
856 was attributable to the DsRed plastid reporter (Figure 1). Fluorescence images of  
857 the same type of tissue used identical exposure conditions.  
858 Five-day-old wild type and six-day-old mutant seedlings were fixed (Figure 4) in  
859 3.5% glutaraldehyde and subject to cell separation in 0.1M EDTA, pH9, prior to  
860 observation in a differential interference contrast Nikon Optiphot-2 microscope.

861 Cells (n=13-18) of four independent cotyledons per genotype were observed,  
862 with cell plan areas, chloroplast number and individual area calculated as  
863 described (Loudya et al., 2020).

864

### 865 **Analysis of root development**

866 Seedlings were cultured *in vitro*, under the conditions described in Supplemental  
867 Figure 1, images taken and root length quantified using ImageJ (ImageJ.net)  
868 software.

869

### 870 **Map-based cloning of *cue8*.**

871 Two mapping populations were generated following a *cue8* x *La-er* cross. In one,  
872 F2 mutant plants were selected (genotype *cue8/cue8*); in another, wild type (WT)  
873 plants were selected, grown to maturity and their progeny individually scored to  
874 identify plants without *cue8* progeny (genotype +/+). A third mutant mapping  
875 population was generated following a *cue8* x Col-0 cross. 344, 557 and 619  
876 plants were selected respectively (total 1520 plants) in the three mapping  
877 populations. Plants were examined at polymorphic markers 541 and 692 (Col-0  
878 population) or 576 and 613 (*La-er* populations). DNA was extracted from pools of  
879 3-4 plants, was examined and, if a recombination event identified, individual  
880 plants were retested to identify the recombinant. Other polymorphisms between  
881 Col-0 and *La-er* (TAIR, [www.arabidopsis.org](http://www.arabidopsis.org)) were developed as polymorphic  
882 markers by designing flanking primers for PCR amplification and differential  
883 enzyme digestion (Supplemental Table 1), and screening Col-0, *La-er* and  
884 pOCA108 genomic DNA. pOCA108 sequence was more frequently found to be  
885 polymorphic against *La-er* (13/20) than against Col-0 (7/20). Genes in the region  
886 of interest were ruled out by isolation of KOs of the SALK collection following  
887 genotyping with the respective forward, reverse and border primers (Alonso et  
888 al., 2003) (Supplemental Table 2). When no homozygous KO was identified  
889 (AT5G22600, AT5G22640, AT5G22650, AT5G22660, AT5G22670, AT5G22680,  
890 AT5G22710, AT5G22730), primer pairs were designed covering the full open



891 reading frame, and amplicons obtained using *cue8* genomic DNA template  
892 submitted for Sanger sequencing (DNASEq, Medical Sciences Institute,  
893 University of Dundee, UK). When polymorphisms against the TAIR sequence  
894 occurred, amplicons for the pOCA108 WT were also sequenced (AT5G22640,  
895 AT5G22650, AT5G22660, AT5G22670, AT5G22710, AT5G22730).

896

### 897 **Vector construction and complementation.**

898 A Transformation-competent Artificial Chromosome (TAC (Liu et al., 2000), JatY-  
899 57L07, containing the genomic region covering genes AT5G22640 to  
900 AT5G22740, was obtained as an *E. coli* stab culture from the John Innes Centre  
901 (Norwich, UK). The TAC was introduced into *Agrobacterium* strain GV3101 by  
902 electroporation, followed by transformation of *Arabidopsis cue8* using the floral  
903 dip method (Clough and Bent, 1998). Selection of transformants utilised  
904 resistance to BASTA (Glufosinate), sprayed at 150mg/l as a mist every 3 days.  
905 Diagnostic PCR used the primers pYLTA17-F (AATCCTGTTGCCDCCTTG) in  
906 the vector, and 57L07-FOR-R (GTCTGAGCCAGAGCCAGAGCTTGAGG) in the  
907 insert, and produced a 607 bp amplicon. A separate TAC, JatY-76P13, covering  
908 a broader region, was employed in the same way but generated no  
909 transformants.

910 To produce a full-length WT cDNA, RNA was isolated (RNeasy kit, Qiagen,  
911 Manchester, UK) from pOCA108 plants, cDNA synthesised (AMV Reverse  
912 Transcriptase kit, Promega, Southampton, UK) and amplified with primers  
913 CUE8cDNA-F (CACCATGGCTAACGAAGAACTCAC) and CUE8cDNA-STOP-R  
914 (AGAGACTCAAGACACAGCAGGA) using BIO-X-ACT Long DNA polymerase  
915 (Bioline, London, UK). The 2622 bp product was directionally cloned by ligation  
916 into the pENTR/D-TOPO vector (Invitrogen/Thermo Fisher Scientific, Hemel  
917 Hempstead, UK). Digestion with EcoRV and NotI generated 2742 and 2435  
918 bands, confirming the cloning of the full-length cDNA, and that with EcoRI and  
919 EcoRV generated 591 and 4586 bp bands, confirming the forward orientation.  
920 Sequencing confirmed the absence of errors. The TOPO vector insert was

921 cloned into pB7WG2 vector (Karimi et al., 2002) using Gateway recombination, to  
922 produce the pB7WG2/CUE8c construct. The pB7WG2 vector includes an  
923 upstream 35S promoter. Sequencing confirmed the correct orientation and  
924 absence of errors. Transformation of pB7WG2/CUE8c used the floral dip method.  
925 Transformants were selected using BASTA. Primers cDNAgate-F  
926 (TGCCCAGCTATCTGTCACTTC) in the vector, and cDNAgate-R  
927 (CTTCCAACGTTCTGGGTCTC) in the *CUE8* sequence, generated a diagnostic  
928 808 bp amplicon.

929

### 930 ***In silico* structure and expression analysis.**

931 Domain structure of the polypeptide sequence was analysed at  
932 <https://www.ebi.ac.uk/interpro/protein/UniProt/>. Three-dimensional predicted  
933 structure was obtained at <https://alphafold.ebi.ac.uk/>.  
934 Expression of *CUE8/TIC100/EMB1211* in the Arabidopsis GeneAtlas data  
935 (Schmid et al., 2005), available at  
936 <http://jsp.weigelworld.org/AtGenExpress/resources/>, was compared with that of a  
937 typical photosynthetic protein, *LHCB2* (AT2G05100) and a housekeeping plastid  
938 import component, *TOC34* (AT5G05000). Gene expression correlators in relation  
939 to development, AtGenExpress tissue compendium (Schmid et al., 2005) were  
940 identified using the BioArray Resource (Toufighi et al., 2005) available at  
941 <http://bar.utoronto.ca/>. Coexpressors were also identified using ATTD-II  
942 (Obayashi et al., 2018).

943

### 944 **Chloroplast protein import assays and protein immunoblots.**

945 Chloroplasts were isolated from seedlings (Figure 3 and Figure 6) grown *in vitro*  
946 to equivalent stages of cotyledons and first leaf pair, for approximately 13 days  
947 (WT) and 17 days (mutants). Chloroplasts were isolated, examined by phase-  
948 contrast microscopy to confirm integrity, and their density quantified. Isolation  
949 and import assays using equal numbers of chloroplasts and the RBCS and  
950 RPL11 radiolabelled pre-proteins were carried out as previously described (Kubis

951 et al., 2003). The fraction of pre-protein imported, obtained by quantifying on the  
952 same import product gel, depended on assay but was at least 10%. Extracts of  
953 total chloroplast protein were prepared and equal amounts of protein of WT and  
954 mutant were fractionated and subject to immunoblot using specific antibodies, as  
955 described (Kikuchi et al., 2013). Protein samples were denatured at 100 °C for 5  
956 minutes except for the TIC214 (37 °C for 30 minutes) as described (Kikuchi et al.,  
957 2013). Antibody dilutions are given in the Supplemental Table 5. Quantitation of  
958 bands was carried out as described (Kubis et al., 2003) or using ImageJ  
959 software.

960

#### 961 **RNA extraction and quantitative real-time RT-PCR analysis.**

962 Total RNA was extracted from *in vitro*-grown (under continuous light) 5-day-old  
963 wild type and 6-day-old *tic100<sup>cue8</sup>* seedlings. Age differences other than 24h  
964 could have resulted in spurious circadian effects. Nucleic acid extraction and  
965 quantitation, cDNA synthesis, real time-PCR amplifications, assessment of  
966 product quality and quantitation of expression in the mutant relative to that in the  
967 pOCA108 wild type was carried out as previously described (Loudya et al.,  
968 2020). Primer pairs for qRT-PCR are listed in Supplemental Table 6.

969

#### 970 **Mutagenesis and isolation of *soh1*.**

971 The *tic100<sup>cue8</sup>* seeds (over 5,000) were mutagenized using 50 mM ethyl  
972 methanesulfonate for 4 hrs. About 5,000 healthy M1 *tic100<sup>cue8</sup>* plants (carrying  
973 heterozygous mutations) were grown as 50 pools. A putative suppressor in the  
974 M2 population from pool 18 was isolated several times and found to have a  
975 dramatic phenotype after 2 weeks on soil, which was confirmed by genotyping for  
976 the *tic100<sup>cue8</sup>* mutation. The protochlorophyllide and chlorophyll content in its M3  
977 progeny seedlings further showed a clear suppression of *tic100<sup>cue8</sup>*. Genetic  
978 analysis of a backcross led to the conclusion of a semi-dominant suppressor  
979 mutation. Pair-wise crosses of these suppressors from pool 18 showed them to  
980 be allelic.

981

982 **Protochlorophyllide and chlorophyll content.**

983 Pigments were extracted in dimethyl formamide and quantitation was carried out  
984 by spectrophotometry or spectrofluorimetry as previously described (López-Juez  
985 et al., 1998; Vinti et al., 2005).

986

987 **Mapping by sequencing of the *soh1* mutation.**

988 The *soh1* mutation was identified by short-read mapping of a DNA pool from 150  
989 backcrossed BC1F2 (see Supplemental Figure 5) recombinant *tic100<sup>cue8</sup>*  
990 phenotypes (F), as well as 100 unmutagenised *tic100<sup>cue8</sup>* wild types (P1) and 100  
991 homozygous *soh1* (P2) parents. Sequencing was carried out at the Oxford  
992 Genomics Centre, Wellcome Trust Centre for Human Genetics  
993 (<http://www.well.ox.ac.uk/ogc/>) and mapping-by-sequencing was performed using  
994 the SHOREmap analysis package  
995 (<http://bioinfo.mpiiz.mpg.de/shoremap/guide.html>). To narrow the region, filters  
996 were set for quality reads (>100) and indels were included to make sure the  
997 polymorphisms of Bensheim were not considered as causal mutations. To  
998 identify the semi-dominant mutation a mapping strategy was designed to first  
999 compare the polymorphisms in the *tic100<sup>cue8</sup> soh1* parent (P2, test) caused by  
1000 mutagenesis and that are absent in the *tic100<sup>cue8</sup>* parent (P1, reference) which  
1001 gave list A. Secondly, the polymorphisms (induced mutations) in the backcrossed  
1002 F2 *tic100<sup>cue8</sup>* population which are absent in P1 resulted in list B. In the last step,  
1003 list A was used as a test and list B as a reference to find out the EMS-induced  
1004 true SNPs.

1005

1006 **Gene cloning and generation of transgenic plants.**

1007 Gene cloning was performed using Gateway<sup>®</sup> Technology (Invitrogen). The  
1008 primers used for the generation of transgenic plants and transient assays are  
1009 listed in the Supplemental Table 7. The full coding sequences (CDSs) of  
1010 *tic100<sup>soh1</sup>* and *tic100<sup>cue8</sup>* genes were PCR amplified from the cDNA of the

1011 respective Arabidopsis genotypes (Bensheim). The CDSs from entry and  
1012 destination vectors were confirmed by sequencing (Eurofins Genomics,  
1013 Constance, Germany) and transformed into the *tic100<sup>cue8</sup>* mutant using  
1014 *Agrobacterium*-mediated transformation (floral dipping). At least 10 T1 plants  
1015 resistant on BASTA plates were genotyped in each case (*35S:tic100<sup>soh1</sup>* and  
1016 *35S:tic100<sup>cue8</sup>*) and confirmed to carry the transgene.

1017

### 1018 **Subcellular localisation of TIC100 fluorescent protein fusions.**

1019 To study the protein localization using YFP fluorescence, the CDSs of *TIC100*,  
1020 *tic100<sup>cue8</sup>* and *tic100<sup>soh1</sup>* genes were PCR-amplified without the stop codon from  
1021 the cDNA of their Arabidopsis parent (Bensheim genotype). The CDSs were  
1022 introduced into the entry vector, sequenced and later subcloned into the plant  
1023 expression vector p2GWY7 carrying a C-terminal YFP tag (Karimi et al., 2005).  
1024 Protoplast isolation and transfection assays were carried out as described  
1025 previously (Wu et al., 2009; Ling et al., 2012). Plasmid DNA (5 µg) was  
1026 transfected to 10<sup>5</sup> protoplasts (0.1 ml of protoplast suspension) isolated from  
1027 healthy leaves of Arabidopsis Columbia.

1028 The YFP fluorescence images were captured using a Leica TCS SP5 microscope  
1029 as described previously (Ling et al., 2019). Images shown represent results of at  
1030 least two independent experiments (at least 40 protoplasts per genotype)  
1031 showing the same result.

1032

### 1033 **Lincomycin treatment and associated immunoblot.**

1034 Seeds were plated and seedlings grown *in vitro* as indicated above without  
1035 lincomycin. For lincomycin treatment, seeds were plated on a sterile, fine nylon  
1036 mesh overlaying MS medium with 1% sucrose for 36 hours, at which time the  
1037 mesh with germinating seeds was transferred to new medium containing in  
1038 addition 0.5 mM lincomycin, where they continued to grow. Seedlings were  
1039 harvested for transcripts' analysis at comparable developmental stages: 5 days  
1040 for wild type, 6 days for *tic100<sup>cue8</sup>* and *tic100<sup>soh1</sup>* and 7 for *tic100<sup>soh1</sup> gun1*, with

1041 two additional days for protein analysis in each case. Total protein extraction  
1042 using a urea/acetone powders method, incubation with a primary antibody  
1043 against FtsH2 (Var2) and secondary antibody detection were as described  
1044 (Loudya et al., 2021).

1045

#### 1046 **Quantitation of RNA editing.**

1047 Monitoring and quantitation of editing of two chloroplast mRNAs was carried out  
1048 as previously described (Loudya et al., 2020).

1049

#### 1050 **Statistical analyses.**

1051 Averages and standard errors of the mean are indicated. Regressions, Chi-  
1052 squared, Student's t-tests (two-tailed) and ANOVA followed by Dunnett's tests  
1053 were carried out in Microsoft Excel®, with plug-ins from Real-Statistics.com, for  
1054 data using the numbers of replicates indicated for each experiment. For  
1055 morphological parameters, chloroplast quantitative data, chloroplast  
1056 preparations, import assays, immunoblots and gene expression assays, the  
1057 number of samples represent independent biological replicates.

1058

#### 1059 **Supplemental Data.**

1060

1061 **Supplemental Figure 1.** Mutation of *CUE8* delays root development, which can  
1062 be partly but not fully rescued by growth on sucrose. Supports Figure 1.

1063 **Supplemental Figure 2.** Complementation of *cue8* by genomic DNA containing  
1064 *TIC100*. Supports Figure 2.

1065 **Supplemental Figure 3.** Developmental expression of *TIC100*, in relation to that  
1066 of a characteristic photosynthesis-associated and a characteristic plastid  
1067 housekeeping protein nucleus-encoded gene. Supports Figures 2 and 6.

1068 **Supplemental Figure 4.** Chloroplasts of *tic100<sup>cue8</sup>* exhibit reduction specifically  
1069 in 1 MDa complex component proteins. Supports Figure 3.

1070 **Supplemental Figure 5.** Semidominant phenotype of the *soh1* mutation, and the  
1071 mapping strategy for gene identification. Supports Figure 5.

1072 **Supplemental Figure 6.** Overexpression of *tic100<sup>cue8</sup>* in the *tic100<sup>cue8</sup>* mutant  
1073 does not suppress the mutant phenotype. Supports Figure 5E.

1074 **Supplemental Figure 7.** Localisation of the TIC100 protein, in its wild type,  
1075 TIC100<sup>cue8</sup> and double-mutated TIC100<sup>soh1</sup> forms, to the cytoplasm and the  
1076 chloroplast periphery of transformed, over-expressing intact protoplasts.  
1077 Supports Figure 5F.

1078 **Supplemental Figure 8.** Expression of *TIC/TOC* genes in *tic100<sup>cue8</sup> gun1* and  
1079 *gun1* seedlings, measured relative to their expression in the wild type. Supports  
1080 Figure 7.

1081 **Supplemental Table 1.** List of polymorphic markers used for map-based cloning  
1082 of *CUE8*. Supports Figure 2.

1083 **Supplemental Table 2.** Analysis of the genomic region containing the *CUE8* gene,  
1084 and strategies used to rule out alternatives. Supports Figure 2.

1085 **Supplemental Table 3.** Polymorphisms in the *TIC100* sequence between the different  
1086 genotypes and mutants. Supports Figure 2.

1087 **Supplemental Table 4.** Primers used for genotyping the point mutants by dCAPS  
1088 /CAPS.

1089 **Supplemental Table 5.** Antibody dilutions used in immunoblotting.

1090 **Supplemental Table 6.** List of primers used for quantitative real-time RT-PCR.

1091 **Supplemental Table 7.** Primers used for gene cloning and transgenic approaches.

1092 **Supplemental Datasets 1 and 2.** Developmental expression co-regulators of  
1093 *CUE8* identified using Arabidopsis Gene Atlas data, and expression co-regulators  
1094 according to ATTED-II.

1095

1096 **Acknowledgments**



1097 We are grateful to Masato Nakai (Osaka University) for the 1 MDa component  
1098 antibodies, Kenichi Yamaguchi (Nagasaki University) and Wataru Sakamoto  
1099 (Okayama University for RPL2 and FtsH2 (Var2) antisera respectively, Elizabeth  
1100 Haswell (Washington University) for the plastid-targeted DsRed line, Ian Bancroft  
1101 (John Innes Centre) for the JatY clones, Korbinian Schneeberger (MPI for Plant  
1102 Breeding Research) for advice on SHOREmap and John R. Bowyer (Royal  
1103 Holloway) for help mapping *tic100<sup>cue8</sup>*. This work was funded by doctoral  
1104 studentships from the UK's BBSRC to DM, the Government of India's Ministry of  
1105 Tribal Affairs to NL and the Brunei Government Ministry of Education to SMA, by  
1106 BBSRC grants BB/J009369/1, BB/K018442/1, BB/N006372/1, BB/R016984/1  
1107 and BB/R009333/1 to RPJ and BB/SB13314 to Prof. Laszlo Bogre and ELJ, and  
1108 by Royal Holloway strategy funds to ELJ. Dedicated to the memory of Prof. John  
1109 R. Bowyer, with whom many deeply insightful discussions were held, and Prof.  
1110 Danny J. Schnell, a towering figure who pioneered our modern understanding of  
1111 protein import into chloroplasts. The authors declare no competing interests.

1112

1113 **Author contributions:** NL, DM, JB, RPJ and ELJ designed the research. DM  
1114 with assistance of ELJ cloned the *CUE8* gene. NL isolated *soh1* and cloned the  
1115 gene with assistance from SMA. NL and JB performed *in vitro* import assays and  
1116 associated immunoblot experiments. NL performed all microscopy analysis, gene  
1117 expression quantitation, cloning of fusion proteins, subcellular localisation,  
1118 lincomycin-associated immunoblot and RNA editing assays. NL and ELJ  
1119 performed genetics, coexpression and protein folding analyses. NL, RPJ and ELJ  
1120 wrote the manuscript. PFD, RPJ and ELJ supervised the project.

1121

1122

## Parsed Citations

Alonso, J.M., Stepanova, A.N., Leisse, T.J., Kim, C.J., Chen, H.M., Shinn, P., Stevenson, D.K., Zimmerman, J., Barajas, P., Cheuk, R., Gadrinab, C., Heller, C., Jeske, A., Koesema, E., Meyers, C.C., Parker, H., Prednis, L., Ansari, Y., Choy, N., Deen, H., Geralt, M., Hazari, N., Hom, E., Karnes, M., Mulholland, C., Ndubaku, R., Schmidt, I., Guzman, P., Aguilar-Henonin, L., Schmid, M., Weigel, D., Carter, D.E., Marchand, T., Risseeuw, E., Brogden, D., Zeko, A., Crosby, W.L., Berry, C.C., and Ecker, J.R. (2003). Genome-wide Insertional mutagenesis of *Arabidopsis thaliana*. *Science* 301, 653-657.

Google Scholar: [Author Only](#) [Title Only](#) [Author and Title](#)

Arsovski, A.A., Galstyan, A., Guseman, J.M., and Nemhauser, J.L. (2012). Photomorphogenesis. *The Arabidopsis book / American Society of Plant Biologists* 10, e0147.

Google Scholar: [Author Only](#) [Title Only](#) [Author and Title](#)

Bolter, B., and Soll, J. (2016). Once upon a Time - Chloroplast Protein Import Research from Infancy to Future Challenges. *Mol Plant* 9, 798-812.

Google Scholar: [Author Only](#) [Title Only](#) [Author and Title](#)

Bolter, B., and Soll, J. (2017). Ycf1/Tic214 Is Not Essential for the Accumulation of Plastid Proteins. *Mol Plant* 10, 219-221.

Google Scholar: [Author Only](#) [Title Only](#) [Author and Title](#)

Borner, T., Aleynikova, A.Y., Zubo, Y.O., and Kusnetsov, V.V. (2015). Chloroplast RNA polymerases: Role in chloroplast biogenesis. *Bba-Bioenergetics* 1847, 761-769.

Google Scholar: [Author Only](#) [Title Only](#) [Author and Title](#)

Cackett, L., Luginbuehl, L.H., Schreier, T.B., Lopez-Juez, E., and Hibberd, J.M. (2021). Chloroplast development in green plant tissues: the interplay between light, hormone, and transcriptional regulation. *New Phytol.*

Google Scholar: [Author Only](#) [Title Only](#) [Author and Title](#)

Chen, L.j., and Li, H.m. (2017). Stable megadalton TOC–TIC supercomplexes as major mediators of protein import into chloroplasts. *The Plant Journal* 92, 178-188.

Google Scholar: [Author Only](#) [Title Only](#) [Author and Title](#)

Chen, X.J., Smith, M.D., Fitzpatrick, L., and Schnell, D.J. (2002). In vivo analysis of the role of atTic20 in protein import into chloroplasts. *Plant Cell* 14, 641-654.

Google Scholar: [Author Only](#) [Title Only](#) [Author and Title](#)

Chotewutmontri, P., and Barkan, A. (2016). Dynamics of Chloroplast Translation during Chloroplast Differentiation in Maize. *Plos Genet* 12.

Google Scholar: [Author Only](#) [Title Only](#) [Author and Title](#)

Chu, C.C., Swamy, K., and Li, H.M. (2020). Tissue-Specific Regulation of Plastid Protein Import via Transit-Peptide Motifs. *Plant Cell* 32, 1204-1217.

Google Scholar: [Author Only](#) [Title Only](#) [Author and Title](#)

Clough, S.J., and Bent, A.F. (1998). Floral dip: a simplified method for *Agrobacterium*-mediated transformation of *Arabidopsis thaliana*. *Plant J* 16, 735-743.

Google Scholar: [Author Only](#) [Title Only](#) [Author and Title](#)

Dahlin, C., and Cline, K. (1991). Developmental regulation of the plastid protein import apparatus. *The Plant Cell* 3, 1131-1140.

Google Scholar: [Author Only](#) [Title Only](#) [Author and Title](#)

de Vries, J., Sousa, F.L., Bolter, B., Soll, J., and Gould, S.B. (2015). Ycf1: A Green Tic? *Plant Cell* 27, 1827-1833.

Google Scholar: [Author Only](#) [Title Only](#) [Author and Title](#)

Demarsy, E., Lakshmanan, A.M., and Kessler, F. (2014). Border control: selectivity of chloroplast protein import and regulation at the TOC-complex. *Frontiers in plant science* 5, 483.

Google Scholar: [Author Only](#) [Title Only](#) [Author and Title](#)

Haswell, E.S., and Meyerowitz, E.M. (2006). MscS-like proteins control plastid size and shape in *Arabidopsis thaliana*. *Curr Biol* 16, 1-11.

Google Scholar: [Author Only](#) [Title Only](#) [Author and Title](#)

Heins, L., Mehrle, A., Hemmler, R., Wagner, R., Kuchler, M., Hormann, F., Sveshnikov, D., and Soll, J. (2002). The preprotein conducting channel at the inner envelope membrane of plastids. *EMBO Journal* 21, 2616-2625.

Google Scholar: [Author Only](#) [Title Only](#) [Author and Title](#)

Inaba, T., Li, M., Alvarez-Huerta, M., Kessler, F., and Schnell, D.J. (2003). atTic110 functions as a scaffold for coordinating the stromal events of protein import into chloroplasts. *Journal of Biological Chemistry* 278, 38617-38627.

Google Scholar: [Author Only](#) [Title Only](#) [Author and Title](#)

Ivanova, Y., Smith, M.D., Chen, K., and Schnell, D.J. (2004). Members of the Toc159 import receptor family represent distinct pathways for protein targeting to plastids. *Molecular Biology of the Cell* 15, 3379-3392.

Google Scholar: [Author Only](#) [Title Only](#) [Author and Title](#)

Jarvis, P. (2008). Targeting of nucleus-encoded proteins to chloroplasts in plants. *New Phytol* 179, 257-285.

Google Scholar: [Author Only](#) [Title Only](#) [Author and Title](#)

Jarvis, P., and López-Juez, E. (2013). Biogenesis and homeostasis of chloroplasts and other plastids. *Nature reviews. Molecular cell biology* 14, 787-802.

Google Scholar: [Author Only](#) [Title Only](#) [Author and Title](#)

Jumper, J., Evans, R., Pritzel, A., Green, T., Figurnov, M., Ronneberger, O., Tunyasuvunakool, K., Bates, R., Zidek, A., Potapenko, A., Bridgland, A., Meyer, C., Kohli, S.A.A., Ballard, A.J., Cowie, A., Romera-Paredes, B., Nikolov, S., Jain, R., Adler, J., Back, T., Petersen, S., Reiman, D., Clancy, E., Zielinski, M., Steinegger, M., Pacholska, M., Berghammer, T., Bodenstein, S., Silver, D., Vinyals, O., Senior, A.W., Kavukcuoglu, K., Kohli, P., and Hassabis, D. (2021). Highly accurate protein structure prediction with AlphaFold. *Nature*.

Google Scholar: [Author Only](#) [Title Only](#) [Author and Title](#)

Kakizaki, T., Yazu, F., Nakayama, K., Ito-Inaba, Y., and Inaba, T. (2012). Plastid signalling under multiple conditions is accompanied by a common defect in RNA editing in plastids. *J Exp Bot* 63, 251-260.

Google Scholar: [Author Only](#) [Title Only](#) [Author and Title](#)

Karimi, M., Inze, D., and Depicker, A. (2002). GATEWAY vectors for Agrobacterium-mediated plant transformation. *Trends Plant Sci* 7, 193-195.

Google Scholar: [Author Only](#) [Title Only](#) [Author and Title](#)

Karimi, M., De Meyer, B., and Hilson, P. (2005). Modular cloning in plant cells. *Trends Plant Sci* 10, 103-105.

Google Scholar: [Author Only](#) [Title Only](#) [Author and Title](#)

Kasmati, A.R., Topel, M., Patel, R., Murtaza, G., and Jarvis, P. (2011). Molecular and genetic analyses of Tic20 homologues in *Arabidopsis thaliana* chloroplasts. *Plant J* 66, 877-889.

Google Scholar: [Author Only](#) [Title Only](#) [Author and Title](#)

Kessler, F., and Blobel, G. (1996). Interaction of the protein import and folding machineries in the chloroplast. *P Natl Acad Sci USA* 93, 7684-7689.

Google Scholar: [Author Only](#) [Title Only](#) [Author and Title](#)

Kikuchi, S., Bedard, J., Hirano, M., Hirabayashi, Y., Oishi, M., Imai, M., Takase, M., Ide, T., and Nakai, M. (2013). Uncovering the protein translocon at the chloroplast inner envelope membrane. *Science* 339, 571-574.

Google Scholar: [Author Only](#) [Title Only](#) [Author and Title](#)

Kikuchi, S., Asakura, Y., Imai, M., Nakahira, Y., Kotani, Y., Hashiguchi, Y., Nakai, Y., Takafuji, K., Bedard, J., Hirabayashi-Ishioka, Y., Mori, H., Shiina, T., and Nakai, M. (2018). A Ycf2-FtsHi Heteromeric AAA-ATPase Complex Is Required for Chloroplast Protein Import. *Plant Cell* 30, 2677-2703.

Google Scholar: [Author Only](#) [Title Only](#) [Author and Title](#)

Klepikova, A.V., Kasianov, A.S., Gerasimov, E.S., Logacheva, M.D., and Penin, A.A. (2016). A high resolution map of the *Arabidopsis thaliana* developmental transcriptome based on RNA-seq profiling. *Plant J* 88, 1058-1070.

Google Scholar: [Author Only](#) [Title Only](#) [Author and Title](#)

Kohler, D., Helm, S., Agne, B., and Baginsky, S. (2016). Importance of Translocon Subunit Tic56 for rRNA Processing and Chloroplast Ribosome Assembly. *Plant Physiol* 172, 2429-2444.

Google Scholar: [Author Only](#) [Title Only](#) [Author and Title](#)

Kohler, D., Montandon, C., Hause, G., Majovsky, P., Kessler, F., Baginsky, S., and Agne, B. (2015). Characterization of Chloroplast Protein Import without Tic56, a Component of the 1-Megadalton Translocon at the Inner Envelope Membrane of Chloroplasts. *Plant Physiol* 167, 972-990.

Google Scholar: [Author Only](#) [Title Only](#) [Author and Title](#)

Koussevitzky, S., Nott, A., Mockler, T.C., Hong, F., Sabetto-Martins, G., Surpin, M., Lim, I.J., Mittler, R., and Chory, J. (2007). Signals from chloroplasts converge to regulate nuclear gene expression. *Science* 316, 715-719.

Google Scholar: [Author Only](#) [Title Only](#) [Author and Title](#)

Kovacs-Bogdan, E., Benz, J.P., Soll, J., and Bolter, B. (2011). Tic20 forms a channel independent of Tic110 in chloroplasts. *Bmc Plant Biol* 11, 133.

Google Scholar: [Author Only](#) [Title Only](#) [Author and Title](#)

Kubis, S., Baldwin, A., Patel, R., Razzaq, A., Dupree, P., Lilley, K., Kurth, J., Leister, D., and Jarvis, P. (2003). The *Arabidopsis ppi1* mutant is specifically defective in the expression, chloroplast import, and accumulation of photosynthetic proteins. *Plant Cell* 15, 1859-1871.

- Google Scholar: [Author Only](#) [Title Only](#) [Author and Title](#)
- Kubis, S., Patel, R., Combe, J., Bedard, J., Kovacheva, S., Lilley, K., Biehl, A., Leister, D., Rios, G., Koncz, C., and Jarvis, P. (2004). Functional specialization amongst the Arabidopsis Toc159 family of chloroplast protein import receptors. *Plant Cell* 16, 2059-2077.**  
Google Scholar: [Author Only](#) [Title Only](#) [Author and Title](#)
- Li, H.M., Culligan, K., Dixon, R.A., and Chory, J. (1995). Cue1 - a Mesophyll Cell-Specific Positive Regulator of Light-Controlled Gene-Expression in Arabidopsis. *Plant Cell* 7, 1599-1610.**  
Google Scholar: [Author Only](#) [Title Only](#) [Author and Title](#)
- Liang, Q.J., Lu, X.D., Jiang, L., Wang, C.Y., Fan, Y.L., and Zhang, C.Y. (2010). EMB1211 is required for normal embryo development and influences chloroplast biogenesis in Arabidopsis. *Physiol Plantarum* 140, 380-394.**  
Google Scholar: [Author Only](#) [Title Only](#) [Author and Title](#)
- Ling, Q., Huang, W., Baldwin, A., and Jarvis, P. (2012). Chloroplast biogenesis is regulated by direct action of the ubiquitin-proteasome system. *Science* 338, 655-659.**  
Google Scholar: [Author Only](#) [Title Only](#) [Author and Title](#)
- Ling, Q., Broad, W., Trosch, R., Topel, M., Demiral Sert, T., Lympieropoulos, P., Baldwin, A., and Jarvis, R.P. (2019). Ubiquitin-dependent chloroplast-associated protein degradation in plants. *Science* 363, 836-848.**  
Google Scholar: [Author Only](#) [Title Only](#) [Author and Title](#)
- Liu, Y.G., Nagaki, K., Fujita, M., Kawaura, K., Uozumi, M., and Ogihara, Y. (2000). Development of an efficient maintenance and screening system for large-insert genomic DNA libraries of hexaploid wheat in a transformation-competent artificial chromosome (TAC) vector. *Plant J* 23, 687-695.**  
Google Scholar: [Author Only](#) [Title Only](#) [Author and Title](#)
- López-Juez, E., Jarvis, R.P., Takeuchi, A., Page, A.M., and Chory, J. (1998). New Arabidopsis cue mutants suggest a close connection between plastid- and phytochrome regulation of nuclear gene expression. *Plant Physiol* 118, 803-815.**  
Google Scholar: [Author Only](#) [Title Only](#) [Author and Title](#)
- Loudya, N., Okunola, T., He, J., Jarvis, P., and López-Juez, E. (2020). Retrograde signalling in a virescent mutant triggers an anterograde delay of chloroplast biogenesis that requires GUN1 and is essential for survival. *Philosophical transactions of the Royal Society of London. Series B, Biological sciences* 375, 20190400.**  
Google Scholar: [Author Only](#) [Title Only](#) [Author and Title](#)
- Loudya, N., Mishra, P., Takahagi, K., Uehara-Yamaguchi, Y., Inoue, K., Bogre, L., Mochida, K., and Lopez-Juez, E. (2021). Cellular and transcriptomic analyses reveal two-staged chloroplast biogenesis underpinning photosynthesis build-up in the wheat leaf. *Genome Biol* 22.**  
Google Scholar: [Author Only](#) [Title Only](#) [Author and Title](#)
- Lubeck, J., Soll, J., Akita, M., Nielsen, E., and Keegstra, K. (1996). Topology of IEP110, a component of the chloroplastic protein import machinery present in the inner envelope membrane. *EMBO Journal* 15, 4230-4238.**  
Google Scholar: [Author Only](#) [Title Only](#) [Author and Title](#)
- Nakai, M. (2015a). The TIC complex uncovered: The alternative view on the molecular mechanism of protein translocation across the inner envelope membrane of chloroplasts. *Bba-Bioenergetics* 1847, 957-967.**  
Google Scholar: [Author Only](#) [Title Only](#) [Author and Title](#)
- Nakai, M. (2015b). YCF1: A Green TIC: Response to the de Vries et al. Commentary. *Plant Cell* 27, 1834-1838.**  
Google Scholar: [Author Only](#) [Title Only](#) [Author and Title](#)
- Nakai, M. (2018). New Perspectives on Chloroplast Protein Import. *Plant Cell Physiol* 59, 1111-1119.**  
Google Scholar: [Author Only](#) [Title Only](#) [Author and Title](#)
- Nakai, M. (2020). Reply: The Revised Model for Chloroplast Protein Import. *Plant Cell* 32, 543-546.**  
Google Scholar: [Author Only](#) [Title Only](#) [Author and Title](#)
- Obayashi, T., Aoki, Y., Tadaka, S., Kagaya, Y., and Kinoshita, K. (2018). ATTED-II in 2018: A Plant Coexpression Database Based on Investigation of the Statistical Property of the Mutual Rank Index. *Plant Cell Physiol* 59, 440.**  
Google Scholar: [Author Only](#) [Title Only](#) [Author and Title](#)
- Ramundo, S., Asakura, Y., Salome, P.A., Strenkert, D., Boone, M., Mackinder, L.C.M., Takafuji, K., Dinc, E., Rahire, M., Crevecoeur, M., Magneschi, L., Schaad, O., Hippler, M., Jonikas, M.C., Merchant, S., Nakai, M., Rochaix, J.D., and Walter, P. (2020). Coexpressed subunits of dual genetic origin define a conserved supercomplex mediating essential protein import into chloroplasts. *P Natl Acad Sci USA* 117, 32739-32749.**  
Google Scholar: [Author Only](#) [Title Only](#) [Author and Title](#)
- Richardson, L.G.L., and Schnell, D.J. (2020). Origins, function, and regulation of the TOC-TIC general protein import machinery of plastids. *J Exp Bot* 71, 1226-1238.**  
Google Scholar: [Author Only](#) [Title Only](#) [Author and Title](#)

**Richardson, L.G.L., Small, E.L., Inoue, H., and Schnell, D.J. (2018). Molecular Topology of the Transit Peptide during Chloroplast Protein Import. *Plant Cell* 30, 1789-1806.**

Google Scholar: [Author Only](#) [Title Only](#) [Author and Title](#)

**Schafer, P., Helm, S., Kohler, D., Agne, B., and Baginsky, S. (2019). Consequences of impaired 1-MDa TIC complex assembly for the abundance and composition of chloroplast high-molecular mass protein complexes. *PLoS One* 14, e0213364.**

Google Scholar: [Author Only](#) [Title Only](#) [Author and Title](#)

**Schmid, M., Davison, T.S., Henz, S.R., Pape, U.J., Demar, M., Vingron, M., Scholkopf, B., Weigel, D., and Lohmann, J.U. (2005). A gene expression map of *Arabidopsis thaliana* development. *Nat Genet* 37, 501-506.**

Google Scholar: [Author Only](#) [Title Only](#) [Author and Title](#)

**Schneeberger, K., Ossowski, S., Lanz, C., Juul, T., Petersen, A.H., Nielsen, K.L., Jørgensen, J.-E., Weigel, D., and Andersen, S.U.J.N.m. (2009). SHOREmap: simultaneous mapping and mutation identification by deep sequencing. *Nat Methods* 6, 550.**

Google Scholar: [Author Only](#) [Title Only](#) [Author and Title](#)

**Sjuts, I., Soll, J., and Bolter, B. (2017). Import of Soluble Proteins into Chloroplasts and Potential Regulatory Mechanisms. *Frontiers in plant science* 8, 168.**

Google Scholar: [Author Only](#) [Title Only](#) [Author and Title](#)

**Susek, R.E., Ausubel, F.M., and Chory, J.J.C. (1993). Signal transduction mutants of *Arabidopsis* uncouple nuclear CAB and RBCS gene expression from chloroplast development. *Cell* 74, 787-799.**

Google Scholar: [Author Only](#) [Title Only](#) [Author and Title](#)

**Tadini, L., Pesaresi, P., Kleine, T., Rossi, F., Guljamow, A., Sommer, F., Mühlhaus, T., Schroda, M., Masiero, S., and Pribil, M.J.P.p. (2016). GUN1 controls accumulation of the plastid ribosomal protein S1 at the protein level and interacts with proteins involved in plastid protein homeostasis. *Plant Physiol*, pp. 02033.02015.**

Google Scholar: [Author Only](#) [Title Only](#) [Author and Title](#)

**Tadini, L., Peracchio, C., Trotta, A., Colombo, M., Mancini, I., Jeran, N., Costa, A., Faoro, F., Marsoni, M., Vannini, C., Aro, E.M., and Pesaresi, P. (2020). GUN1 influences the accumulation of NEP-dependent transcripts and chloroplast protein import in *Arabidopsis* cotyledons upon perturbation of chloroplast protein homeostasis. *Plant J* 101, 1198-1220.**

Google Scholar: [Author Only](#) [Title Only](#) [Author and Title](#)

**Takeshima, H., Komazaki, S., Nishi, M., Iino, M., and Kangawa, K. (2000). Junctophilins: a novel family of junctional membrane complex proteins. *Mol Cell* 6, 11-22.**

Google Scholar: [Author Only](#) [Title Only](#) [Author and Title](#)

**Teng, Y.S., Chan, P.T., and Li, H.M. (2012). Differential age-dependent import regulation by signal peptides. *PLoS Biol* 10, e1001416.**

Google Scholar: [Author Only](#) [Title Only](#) [Author and Title](#)

**Toufighi, K., Brady, S.M., Austin, R., Ly, E., and Provar, N.J. (2005). The Botany Array Resource: e-Northern, Expression Angling, and Promoter analyses. *Plant J* 43, 153-163.**

Google Scholar: [Author Only](#) [Title Only](#) [Author and Title](#)

**Tsai, J.Y., Chu, C.C., Yeh, Y.H., Chen, L.J., Li, H.M., and Hsiao, C.D. (2013). Structural characterizations of the chloroplast translocon protein Tic110. *Plant J* 75, 847-857.**

Google Scholar: [Author Only](#) [Title Only](#) [Author and Title](#)

**Vinti, G., Fourrier, N., Bowyer, J.R., and López-Juez, E. (2005). *Arabidopsis* cue mutants with defective plastids are impaired primarily in the photocontrol of expression of photosynthesis-associated nuclear genes. *Plant Mol Biol* 57, 343-357.**

Google Scholar: [Author Only](#) [Title Only](#) [Author and Title](#)

**Vojta, A., Alavi, M., Becker, T., Hormann, F., Kuchler, M., Soll, J., Thomson, R., and Schleiff, E. (2004). The protein translocon of the plastid envelopes. *J Biol Chem* 279, 21401-21405.**

Google Scholar: [Author Only](#) [Title Only](#) [Author and Title](#)

**Wu, F.H., Shen, S.C., Lee, L.Y., Lee, S.H., Chan, M.T., and Lin, C.S. (2009). Tape-*Arabidopsis* Sandwich - a simpler *Arabidopsis* protoplast isolation method. *Plant Methods* 5, 16.**

Google Scholar: [Author Only](#) [Title Only](#) [Author and Title](#)

**Wu, G.Z., Meyer, E.H., Richter, A.S., Schuster, M., Ling, Q., Schottler, M.A., Walther, D., Zoschke, R., Grimm, B., Jarvis, R.P., and Bock, R. (2019). Control of retrograde signalling by protein import and cytosolic folding stress. *Nat Plants* 5, 525-538.**

Google Scholar: [Author Only](#) [Title Only](#) [Author and Title](#)



Supplemental Data. Loudya et al. (2021) Plant Cell

1  
2  
3

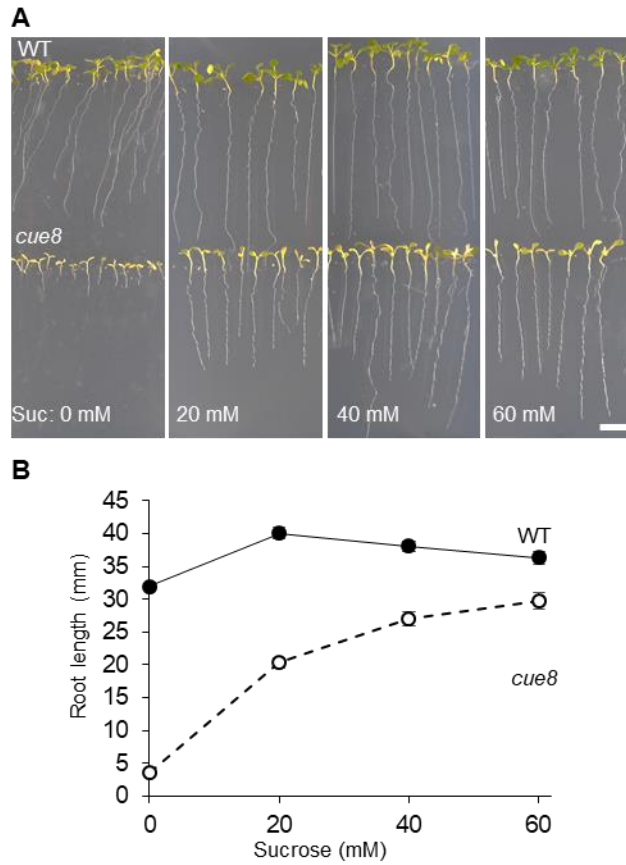

4  
5  
6  
7  
8  
9  
10  
11

**Supplemental Figure 1. Mutation of *CUE8* delays root development, in a way which can be partly but not fully rescued by growth on sucrose. (A)** 14-day-old seedlings of *cue8* and WT grown on vertical plates, on media containing sucrose at the concentrations indicated. Scale bar: 1 cm. **(B)** Measurement of root length of seedlings grown as above. Error bars represent s.e.m. ( $n \geq 30$ ). Values for *cue8* were significantly different to those of WT at each sucrose concentration (Student's t-test,  $p < 0.001$ ). Supports Figure 1.

Supplemental Data. Loudya et al. (2021) Plant Cell

12

13

14

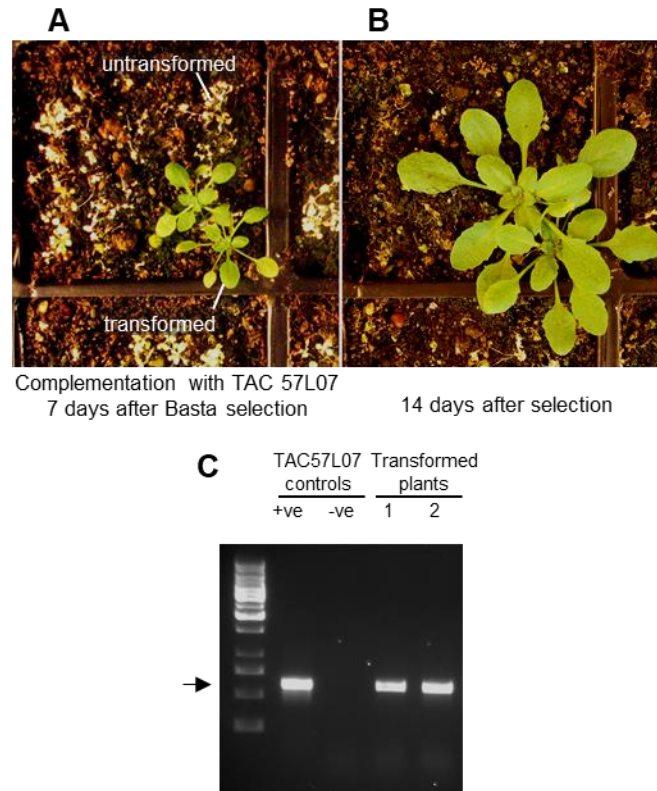

15

16

17

18 **Supplemental Figure 2. Complementation of *cue8* by genomic DNA containing *TIC100*.** (A) pTAC JatY57L07-  
19 transformed *cue8* seedlings, sown on soil, 14 days after germination and 7 days after selection with BASTA, as described  
20 in Supplementary Materials and Methods. Note BASTA-sensitive bleached seedlings. (B) Same seedlings, 21 days after  
21 germination. (C) Diagnostic PCR amplification from complemented plants (1, 2) with one primer specific to the pYLTAC17  
22 vector and another specific to the genomic region of TAC57L07, confirming presence of an expected 607 bp product.  
23 Positive (+ve) control, plasmid DNA harbouring the construct. Negative (-ve) control, DNA from plant prior to  
24 transformation. The second and third bands from the bottom of the left lane correspond to 500 and 750 bp respectively.  
25 Supports Figure 2.



Supplemental Data. Loudya et al. (2021) Plant Cell

26  
27  
28

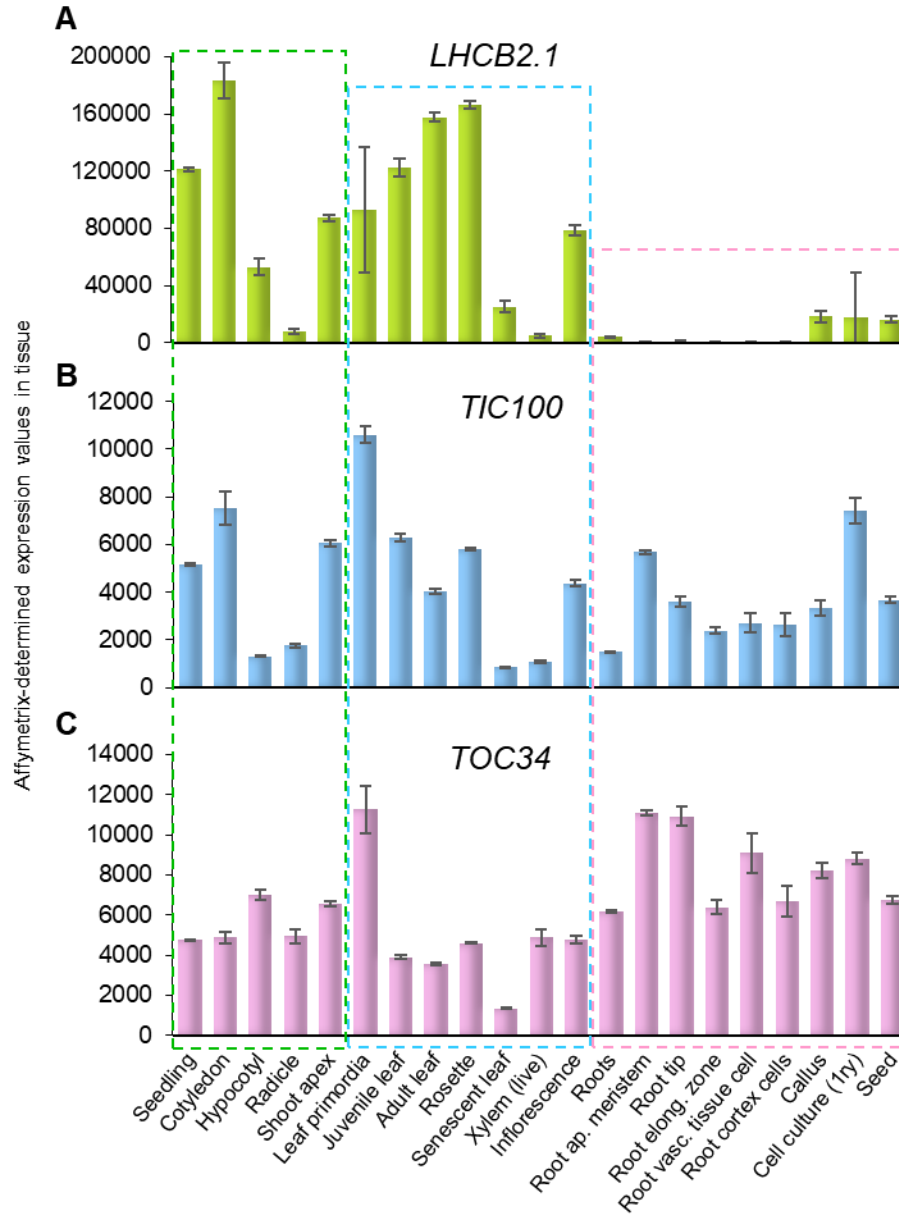

29  
30  
31  
32  
33  
34  
35  
36

**Supplemental Figure 3. Developmental expression of *TIC100*, in relation to that of a characteristic photosynthesis-associated and a characteristic plastid housekeeping protein nucleus-encoded gene. (A) Expression of *LHCb2.1* (AT2G05100), the gene for a photosynthetic antenna polypeptide. (B) Expression of *TIC100*. (C) Expression of *TOC34* (AT2G05100), a housekeeping plastid import component gene. All developmental expression levels as identified by the Arabidopsis GeneAtlas. Supports Figures 2 and 6.**

Supplemental Data. Loudya et al. (2021) Plant Cell

37  
38  
39  
40

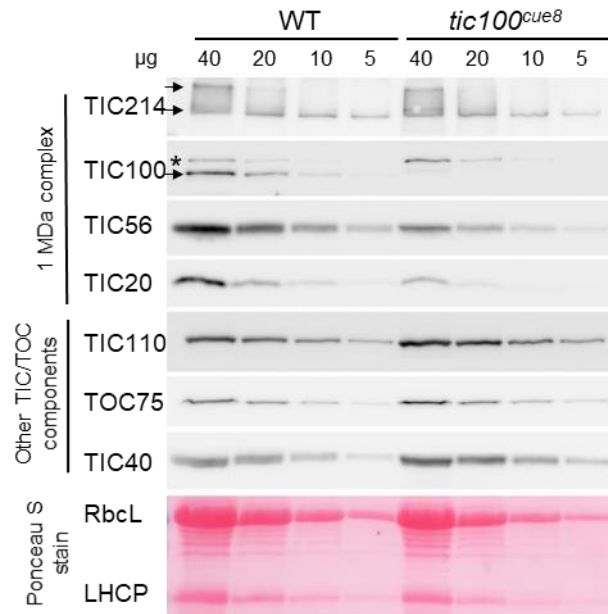

41  
42

43

44 **Supplemental Figure 4. Chloroplasts of *tic100<sup>cue8</sup>* exhibit reduction specifically in 1MDa complex component**  
45 **proteins.** Immunoblot analysis of total chloroplast proteins from the *tic100<sup>cue8</sup>* mutant and wild-type seedlings. The amount  
46 of proteins (µg) loaded is indicated above each lane. The antibodies used for the detection of components of the 1 MDa  
47 complex (TIC20, TIC56, TIC100 and TIC214) or other chloroplast envelope proteins (TOC75, TIC40 and TIC110), are  
48 indicated. In the TIC214 strip both bands, indicated by arrows, correspond to the TIC214 protein, the upper band,  
49 indicated by the top arrow, corresponding to an aggregated form of this protein caused by its large size and hydrophobic  
50 nature. The asterisk on the TIC100 strip represents a non-specific band, which serves as internal control, while the arrow  
51 corresponds to the TIC100 protein. Note the reduced amount of polypeptide components of the 1 MDa complex, in spite  
52 of the increased amount of other envelope polypeptides, including the one labelled with an asterisk in the TIC100 strip, in  
53 the *cue8* samples. The lower strip represents the Ponceau-stained total protein of one of the replica membranes.  
54 Supports Figure 3.

55

Supplemental Data. Loudya et al. (2021) Plant Cell

56

57

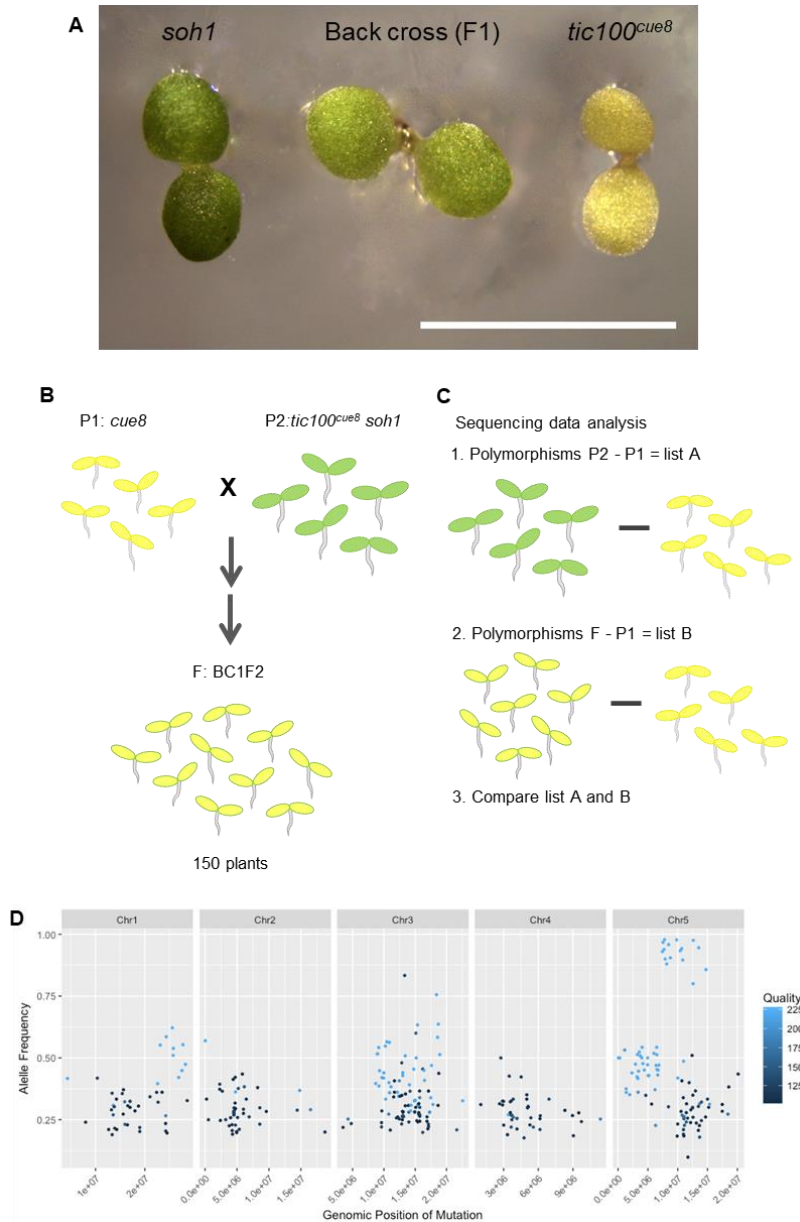

58

59 **Supplemental Figure 5. Semidominant phenotype of the *soh1* mutation, and the mapping strategy for gene**  
 60 **identification. (A)** Heterozygous F1 seedlings of a backcross of *soh1* (the *tic100<sup>cue8</sup> soh1* double mutant) to *tic100<sup>cue8</sup>* are  
 61 shown, together with a *tic100<sup>cue8</sup>* and a homozygous *soh1* seedling. Scale bar: 5 mm. Supports Figure 4. **(B)** Strategy  
 62 followed for the mapping. An F2 population of phenotypically-*cue8* plants was generated from a backcross of the  
 63 semidominant *soh1* mutant (P2) with its *cue8* parent (P1). This population was high-throughput sequenced in bulk, as  
 64 were its two parents, before drawing the two lists of polymorphisms to compare. **(C)** Polymorphisms of both parentals (P1  
 65 and P2) and the bulked backcrossed F2 segregants population (BC1F2) relative to the Arabidopsis Genome Initiative  
 66 sequence were compared as shown. **(D)** Visual output of Shoremap software demonstrating the saturation of recombinant  
 67 mutant allele frequency **(B shared with A)** on chromosome 5 around the *TIC100* (AT5G22640) locus. **B and C support**  
 68 **Figure 5**

69

70

Supplemental Data. Loudya et al. (2021) Plant Cell

71  
72  
73  
74  
75  
76

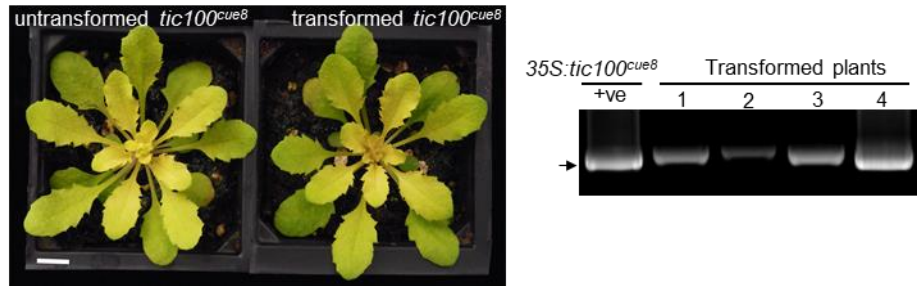

77  
78  
79  
80  
81  
82  
83  
84  
85  
86

**Supplemental Figure 6. Overexpression of *tic100<sup>cue8</sup>* coding sequence in the *tic100<sup>cue8</sup>* mutant does not suppress the mutant phenotype.** Failure of phenocopying of the suppressor *soh1* mutant by transformation of the single *tic100<sup>cue8</sup>* mutant with an over-expressed *tic100<sup>cue8</sup>* sequence driven by the 35S promoter (as seen in 4 independent T1 plants). Plants shown at 40 days of age. Scale bar: 1cm. Gel on the right confirms the genotype of the transformed plants. "+ve": positive genotyping control (bacterial plasmid). Supports Figure 5E.

Supplemental Data. Loudya et al. (2021) Plant Cell

87  
88  
89

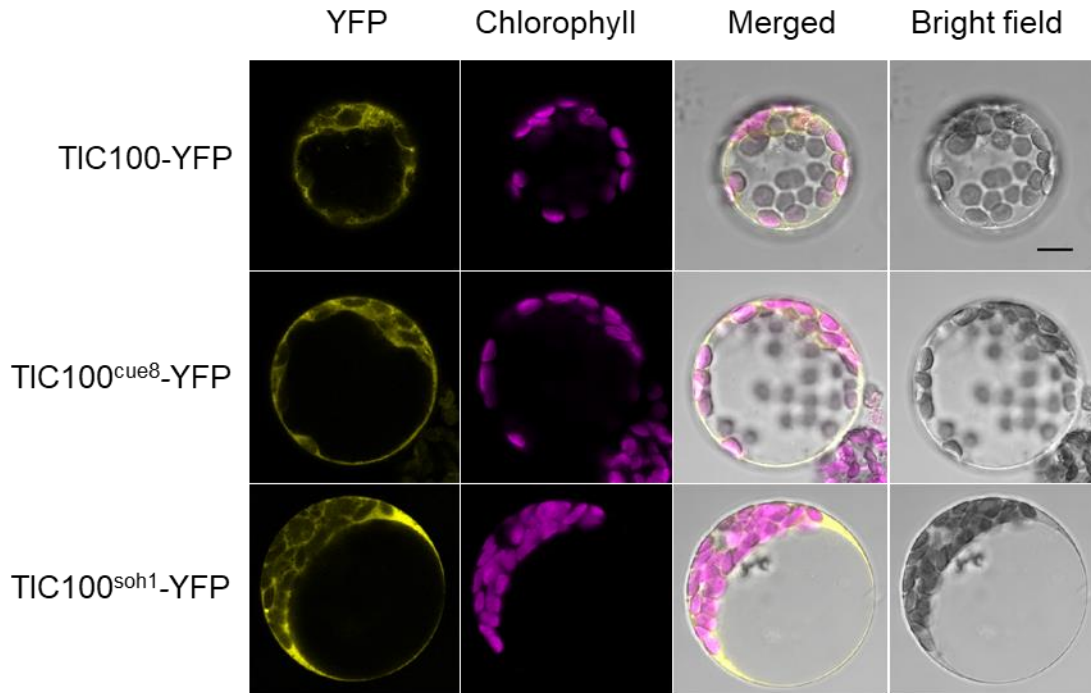

90  
91  
92  
93  
94  
95  
96  
97  
98  
99

**Supplemental Figure 7. Localisation of the TIC100 protein, in its wild type, TIC100<sup>cue8</sup> and double-mutated TIC100<sup>soh1</sup> forms, to the cytoplasm and the chloroplast periphery of transformed, over-expressing intact protoplasts.** Wild-type protoplasts were transfected with constructs encoding wild-type and mutant forms of TIC100, each one tagged with a C-terminal YFP tag, before observation of the fusion protein using confocal microscopy. Scale bar: 10  $\mu$ m. Supports Figure 5F.

Supplemental Data. Loudya et al. (2021) Plant Cell

100

101

102

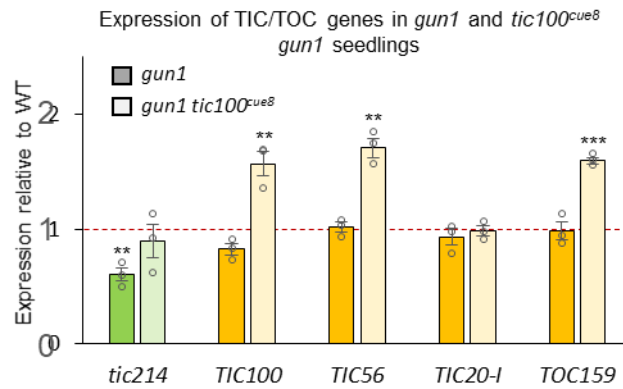

103

104

105 **Supplemental Figure 8. The increase in expression of genes for components of the 1MDa complex observed in**  
106 ***tic100<sup>cue8</sup>* (Fig. 7) is only partially dependent on the action of GUN1, and can be observed to some extent even in**  
107 **GUN1 absence.** Expression, measured by quantitative real-time RT-PCR, of TIC/TOC genes in *tic100<sup>cue8</sup> gun1* seedlings,  
108 measured relative to expression in wild-type seedlings and compared to expression in *gun1*. Note *tic214* is chloroplast-  
109 encoded. The presented values are means, and the error bars show s.e.m. of three RNA samples (biological replicates),  
110 each with two technical replicates. Asterisks represent significance of difference between mutant and WT (as indicated for  
111 Figure 7D, 2-tailed Student's t-test). Dotted lines represent expression in WT. Supports Figure 7.

112

113

114 **Supplemental Table 1.** List of polymorphic markers used for map-based cloning of *CUE8*. Supports Figure 2

| Primer Pair                                 | Chromosome 5 position (bp) | Forward Primer (5' – 3')  | Reverse Primer (5' – 3')     | Product (bp) | Enzyme associated to SNP | Distinguishes ecotype |
|---------------------------------------------|----------------------------|---------------------------|------------------------------|--------------|--------------------------|-----------------------|
| 541                                         | 7021175                    | GACCCATGTCAGAAGGCAAGC     | TTGCGGGATTTGAGAACCTG         | 531          | <i>DraI</i>              | Col-0                 |
| T10F18-72667- <i>CfoI</i>                   | 7137357                    | CTGCGATCTCAGTCGGTTAG      | GCGAAATTTGGGTTTTACGG         | 732          | <i>CfoI</i>              | La-er                 |
| T10F18-57838- <i>HinfI</i>                  | 7152186                    | TGAGTGCCACCAATCAGTTC      | CTCTGTTTCCTCACTGCAACC        | 457          | <i>HinfI</i>             | La-er                 |
| F13M11-106936- <i>HinfI</i> - <i>Csp45I</i> | 7168003                    | TGATGAATTGTGAAGCACTGGTGAG | TCGATTTGAATATGACTGAATGT GAAG | 661          | <i>HinfI</i>             | Col-0                 |
| F13M11-106936- <i>HinfI</i> - <i>Csp45I</i> | 7168003                    | TGATGAATTGTGAAGCACTGGTGAG | TCGATTTGAATATGACTGAATGT GAAG | 661          | <i>Csp45I</i>            | Col-0                 |
| T10F18-35093- <i>PstI</i>                   | 7174931                    | GTTTTGGTCGAGGGTTTGTC      | CAGCAGGTCTTCTGGAGTTG         | 1043         | <i>PstI</i>              | Col-0                 |
| F13M11-96049- <i>NdeI</i>                   | 7178890                    | CAAACCGTAAAATGTCCATAACC   | AGCCACGTGTTGCTACTTCC         | 492          | <i>NdeI</i>              | La-er                 |
| T10F18-27618- <i>DraI</i>                   | 7182406                    | AAAAATCACGGGACGAGTAAAG    | ATCGGCAAGAGACGATGTG          | 820          | <i>DraI</i>              | La-er                 |
| T6G21-20198- <i>EcoRI</i>                   | 7252484                    | CATTTGCTTTTTCGCTTTTC      | GCTTCGACTACTTCGGCTTG         | 918          | <i>EcoRI</i>             | La-er                 |
| T6G12-46724- <i>DdeI</i> - <i>NdeI</i>      | 7279010                    | AATGCTTTAGGGGAGGGTTC      | CAGGATACCTCGTGGAGACAG        | 303          | <i>DdeI</i>              | La-er                 |
| T6G12-46724- <i>DdeI</i> - <i>NdeI</i>      | 7279058                    | AATGCTTTAGGGGAGGGTTC      | CAGGATACCTCGTGGAGACAG        | 303          | <i>NdeI</i>              | La-er                 |
| MWD9-6389- <i>Hin1I</i>                     | 7367463                    | CCGTGGAGTTTTCCATCTTC      | GCCTCGCATTTTTCTTTGTC         | 668          | <i>Hin1I</i>             | La-er                 |
| MWD9-65861- <i>DraI</i>                     | 7426935                    | TGGTTGTTATGGCCAGCTTC      | CAGGCTTTTGCGTGTTTTG          | 958          | <i>DraI</i>              | La-er                 |
| MWD9-73243- <i>SacII</i> - <i>Cfr421</i>    | 7434317                    | CGTTCATATTTCACTCAC        | GTCTTGCTTTGGCTGGCTTC         | 895          | <i>SacII</i>             | La-er                 |
| MWD9-75646- <i>SspI</i>                     | 7436720                    | TAAACGGAGATTCAGGAAAATG    | TCATTCATACCTTCCCTGTGG        | 400          | <i>SspI</i>              | La-er                 |
| MQJ16-39094-SSLP                            | 7485589                    | TAGTGAAACCTTTCTCAGAT      | TTATGTTTTCTTCAATCAGTT        | 100/135      | (length polymorph.)      | La-er                 |
| 271- <i>HinfI</i>                           | 7530652                    | TTCGTCATCTGTTTGGGTTG      | TCCAACCACTTTCTGTCTTCTG       | 540          | <i>HinfI</i>             | Col-0                 |
| MDJ22-63740- <i>TaqI</i>                    | 7567266                    | CATAGTTATGAAGAACTTTGCCTTG | GCCTTCTACGGTTTTTGAGG         | 602          | <i>TaqI</i>              | Col-0                 |
| MRN17-61325- <i>DraI</i>                    | 7666845                    | GCACGAAAGATATGGGGCTAC     | CACTCATGGCTTATTGGATTG        | 1022         | <i>DraI</i>              | La-er                 |
| 692                                         | 7858086                    | CACTGCTTCCGGGATTTAG       | AACCGCAGTGGTTTTCTCTG         | 660          | <i>Hsp92II</i>           | Col-0                 |

115



116

117 **Supplemental Table 2.** Analysis of the genomic region containing the *CUE8* gene, and strategies used to rule out alternatives.

118 Supports Figure 2.

| Accession | Gene product               | Mutation ruled out by complementing TAC? | T-DNA line  | Mutation ruled out by T-DNA phenotype? | Mutation ruled out by sequencing? | <i>CUE8</i> |
|-----------|----------------------------|------------------------------------------|-------------|----------------------------------------|-----------------------------------|-------------|
| AT5G22555 | Expressed protein          | No                                       |             |                                        | ✓                                 |             |
| AT5G22560 | Hypothetical protein       | No                                       |             |                                        | ✓                                 |             |
| AT5G22570 | Transcription Factor       | No                                       |             |                                        | ✓                                 |             |
| AT5G22580 | Expressed protein          | No                                       |             |                                        | ✓                                 |             |
| AT5G22590 | Hypothetical protein       | No                                       | SALK_144064 | ✓                                      | ✓                                 |             |
| AT5G22600 | Expressed protein          | No                                       | SALK_093885 | No T-DNA                               | ✓                                 |             |
| AT5G22610 | F-box family protein       | No                                       | SALK_117573 | ✓                                      |                                   |             |
| AT5G22620 | Phosphoglycer-ate mutase   | No                                       | SALK_012577 | ✓                                      |                                   |             |
| AT5G22630 | Prephenate dehydratase     | No                                       | SALK_028611 | ✓                                      |                                   |             |
| AT5G22640 | TIC100                     | Complemented by JatY-57L07               | SALK_138825 | Embryo/ seedling lethal                | G2087A (gly366arg)                | ✓           |
| AT5G22650 | Histone deacetylases       |                                          |             |                                        | ✓                                 |             |
| AT5G22660 | F-box family protein       |                                          |             |                                        | ✓                                 |             |
| AT5G22670 | F-box family protein       |                                          |             |                                        | ✓                                 |             |
| AT5G22680 | Hypothetical protein       |                                          |             |                                        | ✓                                 |             |
| AT5G22690 | Disease resistance protein |                                          | SALK_039393 | ✓                                      |                                   |             |
| AT5G22700 | F-box family protein       |                                          | SALK_009942 | ✓                                      |                                   |             |
| AT5G22720 | F-box family protein       |                                          | SALK_002785 | ✓                                      |                                   |             |
| AT5G22730 | F-box family protein       |                                          |             |                                        | ✓                                 |             |
| AT5G22740 | Cellulose synthase         |                                          | SALK_149092 | ✓                                      |                                   |             |

119

Supplemental Data. Loudya et al. (2021) Plant Cell

120 **Supplemental Table 3.** Polymorphisms in the *TIC100* sequence between the different  
 121 genotypes and mutants. Supports Figure 2.  
 122 Exon (upper case), intron (low case). In addition to the G366R mutation in *cue8* and the  
 123 additional R345Q mutation in *cue8 soh1*, ten other polymorphisms were observed  
 124 against the Arabidopsis Genome Initiative (Col) sequence. Red highlight: mutation in  
 125 *cue8*. Purple: second mutation in *cue8 soh1*. Yellow, blue and green: polymorphisms  
 126 between *cue8/cue8 soh1/pOCA108* and Col within introns (yellow) and exons (blue,  
 127 green). Two polymorphisms in exons confer silent changes (blue), while the third  
 128 (green) results in a single, conservative amino acid substitution (A820V), distinguishing  
 129 pOCA108 and Col.

| Sequence differences                                    | Found in | Position in relation to ATG in Col-0                        | Nucleotide change                                                                                                                                                                                                                                                                                        | Significance to protein          |
|---------------------------------------------------------|----------|-------------------------------------------------------------|----------------------------------------------------------------------------------------------------------------------------------------------------------------------------------------------------------------------------------------------------------------------------------------------------------|----------------------------------|
| Col different from pOCA108                              | intron   | 1181<br>1207<br>1214<br>1246<br>1987<br>2950<br>3739 - 3740 | tg <sup>g</sup> ta → tg <sup>g</sup> ta<br>at <sup>g</sup> ac → at <sup>g</sup> ac<br>aa <sup>g</sup> aa → aa <sup>g</sup> aa<br>at <sup>g</sup> t → at <sup>g</sup> t<br>ta <sup>g</sup> at → ta <sup>g</sup> at<br>at <sup>g</sup> -tt → at <sup>g</sup> tt<br>t <sup>g</sup> ctc → t <sup>g</sup> --c | None                             |
| Col different from pOCA108                              | EXON     | 3464<br>3551                                                | TTA <sup>g</sup> AC → TT <sup>g</sup> GAC<br>CA <sup>g</sup> AGA → CA <sup>g</sup> GGA                                                                                                                                                                                                                   | None                             |
| Col different from pOCA108                              | EXON     | 4062                                                        | CG <sup>g</sup> AT → CG <sup>g</sup> TAT                                                                                                                                                                                                                                                                 | A820V polymorphism               |
| pOCA108 different from <i>cue8</i> and <i>cue8 soh1</i> | EXON     | 2087                                                        | TT <sup>g</sup> GGG → TT <sup>g</sup> AGG                                                                                                                                                                                                                                                                | G366R <i>cue8</i> point mutation |
| pOCA108 and <i>cue8</i> different from <i>cue8 soh1</i> | EXON     | 1867                                                        | TCC <sup>g</sup> AA → TC <sup>g</sup> AAA                                                                                                                                                                                                                                                                | R345Q <i>soh1</i> point mutation |

130

Supplemental Data. Loudya et al. (2021) Plant Cell

131 **Supplemental Table 4.** Primers used for genotyping the point mutants by dCAPS /CAPS.

| Mutant        | Forward/<br>reverse | Sequence                               | Enzyme<br>digestion            | Band size (bp)                                           |
|---------------|---------------------|----------------------------------------|--------------------------------|----------------------------------------------------------|
| <i>cue8</i>   | cue8-dCAPS-F        | ACATCTTAATGGTAACGCAGGGTAGATTCT<br>ACCT | Dde1<br>(digests <i>cue8</i> ) | <i>cue8</i> (164)<br><i>CUE8</i> (197)                   |
|               | cue8-dCAPS-R        | TCCGCCAAACCAGAATGCAGCTG                |                                |                                                          |
| <i>soh1</i>   | soh1-CAPS-F         | GAGAAACCGTGAGTCTGCGA                   | BsmI<br>(digests <i>SOH1</i> ) | <i>soh1</i> (637 + 176)<br><i>SOH1</i> (358 + 280 + 176) |
|               | soh1-CAPS-R         | AGAGGGTCCTGCACTGATCT                   |                                |                                                          |
| <i>gun1-1</i> | gun1-dCAPS-F        | TAACTATTGCTAAGAGGATTTTCGAAACAG         | AluI<br>(digests <i>GUN1</i> ) | <i>gun1</i> (99)<br><i>GUN1</i> (69 + 30)                |
|               | gun1-dCAPS-R        | CACTTCTCCATAAGCGCTGA                   |                                |                                                          |

132

133

Supplemental Data. Loudya et al. (2021) Plant Cell

134 **Supplemental Table 5.** Antibody dilutions used in immunoblotting.

| Antibody               | Dilution    | Source                  |
|------------------------|-------------|-------------------------|
| Anti-TIC214            | 1:5,000     | Kikuchi et al., 2013    |
| Anti-TIC100            | 1:5,000     |                         |
| Anti-TIC56             | 1:5,000     |                         |
| Anti-TIC20             | 1:50        |                         |
| Anti-TIC110            | 1:5,000     | Ling et al., 2012       |
| Anti-TIC40             | 1:1,000,000 |                         |
| Anti-TOC75             | 1:1,000     |                         |
| Anti-HSP70             | 1:5,000     |                         |
| Anti-RPL2              | 1:5,000     | Subramanian lab, Berlin |
| Anti-FtsH2 (Anti-Var2) | 1:5,000     | Sakamoto lab, Okayama   |

135

136

Supplemental Data. Loudya et al. (2021) Plant Cell

137 **Supplemental Table 6.** List of primers used for quantitative real-time RT-PCR.

| Gene            | Locus     | Forward / Reverse | Primer sequence          |
|-----------------|-----------|-------------------|--------------------------|
| <i>UBQ10</i>    | AT4G05320 | UBQ10-F           | GGAGGATGGTCGTA CTTTGG    |
|                 |           | UBQ10-R           | TCCACTTCAAGGGTGATGGT     |
| <i>TOC159</i>   | AT4G02510 | TOC159-F          | AGAGGCGATTTAGCCCTTGGAG   |
|                 |           | TOC159-R          | CCTGCACGAAGCGCAATCTTTG   |
| <i>TIC100</i>   | AT5G22640 | TIC100_F          | GAGATGATACAGCAAGAACT     |
|                 |           | TIC100_R          | AATTCTTCATCCATATCTTC     |
| <i>TIC56</i>    | AT5G01590 | TIC56-F           | AGGAGTGTCATGAGGCTATTCCG  |
|                 |           | TIC56-R           | AGCTTCTGGCCTACTCGAACAC   |
| <i>TIC20-I</i>  | AT1G04940 | TIC20_F           | CGTTTGTCTGTGATGCTGCC     |
|                 |           | TIC20_R           | GAGGAGTCATAACGATCCAATGT  |
| <i>TIC20-IV</i> | AT4G03320 | TIC20-IV-F        | TTGAGAAGACACCGGAGACC     |
|                 |           | TIC20-IV-R        | AACGTCCTCCACCACCATT C    |
| <i>tic214</i>   | ATCG01130 | TIC214-F          | AGAATCGGCCGGTCAAGTAGAAC  |
|                 |           | TIC214-R          | AATCGAGCTGCTTCGGGATTT C  |
| <i>LHCB1.2</i>  | AT1G29910 | LHCB1-F           | CCGATCCAGTCAACAACAAC     |
|                 |           | LHCB1-R           | TCAAACCATCACATACAACCTTC  |
| <i>RBCS</i>     | AT1G67090 | RBCS-F            | ACTTCCATCACAAGCAACGG     |
|                 |           | RBCS-R            | CGGAATCGGTAAGGTCAGGA     |
| <i>CA1</i>      | AT3G01500 | CA1-F             | GAAGGACTTGTGAAGGGAACA    |
|                 |           | CA1-R             | TTTAACAGAGCTAGTTTCGGAGAG |

138

139

Supplemental Data. Loudya et al. (2021) Plant Cell

140 **Supplemental Table 7.** Primers used for gene cloning and transgenic approaches.

| Primer                 | Sequence                                                | Used to                                                                                                                                              |
|------------------------|---------------------------------------------------------|------------------------------------------------------------------------------------------------------------------------------------------------------|
| TIC100_cDNA_F          | ATGGCTAACGAAGAACTCAC                                    | PCR amplify the <i>cue8</i> or <i>cue8 soh1</i> coding sequences                                                                                     |
| TIC100_cDNA_R          | TCAAGACACAGCAGGAGTCT                                    |                                                                                                                                                      |
| attB1-TIC100_F         | GGGGACAAGTTTGTACAAAAAAGCAG<br>GCTTCATGGCTAACGAAGAACTCAC | PCR amplify and add the attB1B2 sites to <i>cue8</i> or <i>cue8 soh1</i> coding sequences                                                            |
| attB2-TIC100_R         | GGGGACCACTTTGTACAAGAAAGCTG<br>GGTCTCAAGACACAGCAGGAGTCT  |                                                                                                                                                      |
| TIC100_seq_F2          | AGGTTCCAAGCTTGAAGCT                                     | Check the complete CDSs after sequencing                                                                                                             |
| TIC100_seq_R2          | TTGAAGGATCCACTTCTTCT                                    |                                                                                                                                                      |
| TIC100 3'F             | GTATCATCATCTTCTTCTCC                                    | Check the <i>TIC100</i> / <i>cue8</i> / <i>soh1</i> ends and orientation in the vector during sequencing.                                            |
| TIC100 5'R             | GATGTAGAAATCGTCGCCG                                     |                                                                                                                                                      |
| TIC100_cDNA_no stop_R  | AGACACAGCAGGAGTCTCAG                                    | PCR amplify the <i>TIC100</i> / <i>cue8</i> / <i>soh1</i> coding sequences without stop codon for the YFP constructs (combination with TIC100_cDNAF) |
| attB2-TIC100_no stop_R | GGGGACCACTTTGTACAAGAAAGCTG<br>GGTCAGACACAGCAGGAGTCTCAG  | PCR amplify and add the attB1B2 sites to <i>cue8</i> / <i>soh1</i> coding sequences (combination with attB1-TIC100_F)                                |
| pB2GW7_35S_F           | ACGCACAATCCCACTATCCT                                    | Sequence analysis and to genotype the transformed plants.                                                                                            |
| pB2GW7_35S_R           | CAACACATGAGCGAAACCCT                                    |                                                                                                                                                      |
| p2GWY7_35S_F           | ACGCACAATCCCACTATCCT                                    | Sequence analysis and to genotype of the YFP destination vector.                                                                                     |
| p2GWY7_35S_R           | CAACACATGAGCGAAACCCT                                    |                                                                                                                                                      |

141

142

143
